# Supplementary material for: Trends in lung cancer incidence by gender, histological type and stage at diagnosis in Japan, 1993 to 2015: A multiple imputation approach
Source: PubMed Central journal article supplement (PMC9303961; doi:10.1002/ijc.33962), 2022-02-22
Supplement: IJC-151-20-s001.pdf [file IJC-151-20-s001.pdf]

## Supplementary Material

**Title:** Trends in lung cancer incidence by gender, stage at diagnosis and histological type in Japan, 1993–2015: A multiple imputation approach

**Authors:** Phuong The Nguyen, Kota Katanoda, Eiko Saito, Megumi Hori, Tomio Nakayama, Tomohiro Matsuda

### Table of contents:

|                                                                                                                                                                                                                      |    |
|----------------------------------------------------------------------------------------------------------------------------------------------------------------------------------------------------------------------|----|
| Table S1: Selected covariates of male and female lung cancer cases in three cancer registries in Japan, 1993–2015, by periods of diagnosis .....                                                                     | 2  |
| Table S2: Selected covariates of male and female lung cancer cases in three cancer registries in Japan, 1993–2015, by histological type .....                                                                        | 4  |
| Table S3: Selected covariates of male and female lung cancer cases in three cancer registries in Japan, 1993–2015, by stage at diagnosis .....                                                                       | 7  |
| Table S4: ASIRs of lung cancer in three cancer registries in Japan by genders, 1993–2015.....                                                                                                                        | 9  |
| Table S5: Completed and imputed ASIRs of lung cancer in three cancer registries in Japan, 1993–2015, by histological type .....                                                                                      | 10 |
| Table S6: Completed and imputed ASIRs of lung cancer in three cancer registries in Japan, 1993–2015, by stage at diagnosis .....                                                                                     | 14 |
| Table S7: Joinpoint regression analysis of trends in completed ASIRs (before imputation) of lung cancer in three cancer registries in Japan, 1993–2015, by histological type and stage at diagnosis separately. .... | 16 |
| Table S8: Joinpoint regression analysis of trends in completed ASIRs (before imputation) of lung cancer in three cancer registries in Japan, 1993–2015, by histology-stage-combination.....                          | 17 |
| Table S9: Kaplan-Meier log-rank test for equality in survival probability between the completed and imputed data in three cancer registries in Japan, 1993–2015, by stage at diagnosis .....                         | 18 |
| Table S10: Kaplan-Meier log-rank test for equality in survival probability between the completed and imputed data in three cancer registries in Japan, 1993–2015, by histological type.....                          | 19 |
| Figure S1: Completed and imputed ASIRs (before and after imputation) of lung cancer in three cancer registries in Japan, 1993–2015, by histological type and stage at diagnosis.....                                 | 20 |
| Figure S2: Histology- and stage-specific ASIRs of lung cancer in three cancer registries in Japan, 1993–2015, separately by completed and imputed data (before and after imputation).....                            | 21 |
| Figure S3: Completed and imputed female-to-male IRRs (before and after imputation) of lung cancer in three cancer registries in Japan, 1993–2015, by histological type and stage at diagnosis separately .....       | 22 |

Table S1: Selected covariates of male and female lung cancer cases in three cancer registries in Japan, 1993–2015, by periods of diagnosis

| Characteristic            | Male                             |                                    |                                   |                                    |                                    |                      | Female                           |                                   |                                   |                                   |                                   |                      |
|---------------------------|----------------------------------|------------------------------------|-----------------------------------|------------------------------------|------------------------------------|----------------------|----------------------------------|-----------------------------------|-----------------------------------|-----------------------------------|-----------------------------------|----------------------|
|                           | Overall, N = 44,113 <sup>1</sup> | 1993–1999, N = 10,807 <sup>1</sup> | 2000–2004, N = 9,215 <sup>1</sup> | 2005–2009, N = 10,559 <sup>1</sup> | 2010–2015, N = 13,532 <sup>1</sup> | p-value <sup>2</sup> | Overall, N = 18,757 <sup>1</sup> | 1993–1999, N = 4,141 <sup>1</sup> | 2000–2004, N = 3,834 <sup>1</sup> | 2005–2009, N = 4,498 <sup>1</sup> | 2010–2015, N = 6,284 <sup>1</sup> | p-value <sup>2</sup> |
| <b>Age at diagnosis</b>   | 74 [67, 80]                      | 72 [66, 78]                        | 74 [67, 79]                       | 75 [67, 81]                        | 75 [67, 82]                        | <0.001               | 75 [66, 82]                      | 73 [64, 80]                       | 74 [66, 82]                       | 76 [67, 83]                       | 76 [67, 83]                       | <0.001               |
| <b>Age categories</b>     |                                  |                                    |                                   |                                    |                                    | <0.001               |                                  |                                   |                                   |                                   |                                   | <0.001               |
| <50 years                 | 1,225 (2.8%)                     | 406 (3.8%)                         | 300 (3.3%)                        | 269 (2.5%)                         | 250 (1.8%)                         |                      | 731 (3.9%)                       | 252 (6.1%)                        | 157 (4.1%)                        | 139 (3.1%)                        | 183 (2.9%)                        |                      |
| 50–59 years               | 4,016 (9.1%)                     | 966 (8.9%)                         | 869 (9.4%)                        | 1,071 (10.1%)                      | 1,110 (8.2%)                       |                      | 1,943 (10.4%)                    | 474 (11.4%)                       | 413 (10.8%)                       | 502 (11.2%)                       | 554 (8.8%)                        |                      |
| 60–69 years               | 11,281 (25.6%)                   | 3,482 (32.2%)                      | 2,138 (23.2%)                     | 2,212 (20.9%)                      | 3,449 (25.5%)                      |                      | 4,054 (21.6%)                    | 1,006 (24.3%)                     | 822 (21.4%)                       | 821 (18.3%)                       | 1,405 (22.4%)                     |                      |
| 70–79 years               | 17,253 (39.1%)                   | 4,110 (38.0%)                      | 4,054 (44.0%)                     | 4,353 (41.2%)                      | 4,736 (35.0%)                      |                      | 6,224 (33.2%)                    | 1,419 (34.3%)                     | 1,340 (35.0%)                     | 1,472 (32.7%)                     | 1,993 (31.7%)                     |                      |
| 80+ years                 | 10,338 (23.4%)                   | 1,843 (17.1%)                      | 1,854 (20.1%)                     | 2,654 (25.1%)                      | 3,987 (29.5%)                      |                      | 5,805 (30.9%)                    | 990 (23.9%)                       | 1,102 (28.7%)                     | 1,564 (34.8%)                     | 2,149 (34.2%)                     |                      |
| <b>Prefecture</b>         |                                  |                                    |                                   |                                    |                                    | <0.001               |                                  |                                   |                                   |                                   |                                   | <0.001               |
| Yamagata                  | 15,333 (34.8%)                   | 3,760 (34.8%)                      | 3,261 (35.4%)                     | 3,644 (34.5%)                      | 4,668 (34.5%)                      |                      | 5,976 (31.9%)                    | 1,362 (32.9%)                     | 1,210 (31.6%)                     | 1,400 (31.1%)                     | 2,004 (31.9%)                     |                      |
| Fukui                     | 9,653 (21.9%)                    | 2,226 (20.6%)                      | 1,839 (20.0%)                     | 2,442 (23.1%)                      | 3,146 (23.2%)                      |                      | 4,068 (21.7%)                    | 800 (19.3%)                       | 739 (19.3%)                       | 1,019 (22.7%)                     | 1,510 (24.0%)                     |                      |
| Nagasaki                  | 19,127 (43.4%)                   | 4,821 (44.6%)                      | 4,115 (44.7%)                     | 4,473 (42.4%)                      | 5,718 (42.3%)                      |                      | 8,713 (46.5%)                    | 1,979 (47.8%)                     | 1,885 (49.2%)                     | 2,079 (46.2%)                     | 2,770 (44.1%)                     |                      |
| <b>Gini coefficient</b>   | 0.322 ± 0.030 (0.277, 0.376)     | 0.291 ± 0.011 (0.277, 0.301)       | 0.307 ± 0.002 (0.304, 0.309)      | 0.318 ± 0.012 (0.304, 0.331)       | 0.362 ± 0.013 (0.340, 0.376)       | <0.001               | 0.324 ± 0.030 (0.277, 0.376)     | 0.291 ± 0.011 (0.277, 0.301)      | 0.307 ± 0.002 (0.304, 0.309)      | 0.319 ± 0.012 (0.304, 0.331)      | 0.361 ± 0.013 (0.340, 0.376)      | <0.001               |
| <b>Observation period</b> |                                  |                                    |                                   |                                    |                                    | <0.001               |                                  |                                   |                                   |                                   |                                   | <0.001               |
| 0–4 years                 | 37,356 (84.7%)                   | 9,155 (84.7%)                      | 7,583 (82.3%)                     | 8,493 (80.4%)                      | 12,125 (89.6%)                     |                      | 13,837 (73.8%)                   | 3,096 (74.8%)                     | 2,657 (69.3%)                     | 2,938 (65.3%)                     | 5,146 (81.9%)                     |                      |
| 5–9 years                 | 4,844 (11.0%)                    | 676 (6.3%)                         | 886 (9.6%)                        | 1,875 (17.8%)                      | 1,407 (10.4%)                      |                      | 3,398 (18.1%)                    | 301 (7.3%)                        | 553 (14.4%)                       | 1,406 (31.3%)                     | 1,138 (18.1%)                     |                      |
| 10–14 years               | 1,156 (2.6%)                     | 438 (4.1%)                         | 527 (5.7%)                        | 191 (1.8%)                         | 0 (0.0%)                           |                      | 888 (4.7%)                       | 328 (7.9%)                        | 406 (10.6%)                       | 154 (3.4%)                        | 0 (0.0%)                          |                      |
| 15+ years                 | 757 (1.7%)                       | 538 (5.0%)                         | 219 (2.4%)                        | 0 (0.0%)                           | 0 (0.0%)                           |                      | 634 (3.4%)                       | 416 (10.0%)                       | 218 (5.7%)                        | 0 (0.0%)                          | 0 (0.0%)                          |                      |
| <b>Screening detected</b> |                                  |                                    |                                   |                                    |                                    | <0.001               |                                  |                                   |                                   |                                   |                                   | <0.001               |
| Yes                       | 3,833 (8.7%)                     | 925 (8.6%)                         | 723 (7.8%)                        | 887 (8.4%)                         | 1,298 (9.6%)                       |                      | 2,045 (10.9%)                    | 425 (10.3%)                       | 411 (10.7%)                       | 486 (10.8%)                       | 723 (11.5%)                       |                      |
| No                        | 37,967 (86.1%)                   | 9,047 (83.7%)                      | 7,744 (84.0%)                     | 9,211 (87.2%)                      | 11,965 (88.4%)                     |                      | 15,755 (84.0%)                   | 3,417 (82.5%)                     | 3,165 (82.6%)                     | 3,789 (84.2%)                     | 5,384 (85.7%)                     |                      |
| Unknown/missing           | 2,313 (5.2%)                     | 835 (7.7%)                         | 748 (8.1%)                        | 461 (4.4%)                         | 269 (2.0%)                         |                      | 957 (5.1%)                       | 299 (7.2%)                        | 258 (6.7%)                        | 223 (5.0%)                        | 177 (2.8%)                        |                      |
| <b>Surgery</b>            |                                  |                                    |                                   |                                    |                                    | <0.001               |                                  |                                   |                                   |                                   |                                   | <0.001               |
| Yes                       | 9,009 (20.4%)                    | 3,157 (29.2%)                      | 2,344 (25.4%)                     | 2,032 (19.2%)                      | 1,476 (10.9%)                      |                      | 4,299 (22.9%)                    | 1,439 (34.8%)                     | 1,225 (32.0%)                     | 1,030 (22.9%)                     | 605 (9.6%)                        |                      |
| No                        | 28,274 (64.1%)                   | 5,406 (50.0%)                      | 4,754 (51.6%)                     | 7,062 (66.9%)                      | 11,052 (81.7%)                     |                      | 11,532 (61.5%)                   | 1,863 (45.0%)                     | 1,788 (46.6%)                     | 2,762 (61.4%)                     | 5,119 (81.5%)                     |                      |
| Unknown/missing           | 6,830 (15.5%)                    | 2,244 (20.8%)                      | 2,117 (23.0%)                     | 1,465 (13.9%)                      | 1,004 (7.4%)                       |                      | 2,926 (15.6%)                    | 839 (20.3%)                       | 821 (21.4%)                       | 706 (15.7%)                       | 560 (8.9%)                        |                      |
| <b>Chemotherapy</b>       |                                  |                                    |                                   |                                    |                                    | <0.001               |                                  |                                   |                                   |                                   |                                   | <0.001               |
| Yes                       | 13,703 (31.1%)                   | 2,894 (26.8%)                      | 2,516 (27.3%)                     | 3,490 (33.1%)                      | 4,803 (35.5%)                      |                      | 4,529 (24.1%)                    | 850 (20.5%)                       | 750 (19.6%)                       | 1,113 (24.7%)                     | 1,816 (28.9%)                     |                      |

| Characteristic      | Male                                |                                       |                                      |                                       |                                       | p-value <sup>2</sup> | Female                              |                                      |                                      |                                      |                                      | p-value <sup>2</sup> |
|---------------------|-------------------------------------|---------------------------------------|--------------------------------------|---------------------------------------|---------------------------------------|----------------------|-------------------------------------|--------------------------------------|--------------------------------------|--------------------------------------|--------------------------------------|----------------------|
|                     | Overall, N =<br>44,113 <sup>1</sup> | 1993–1999,<br>N = 10,807 <sup>1</sup> | 2000–2004,<br>N = 9,215 <sup>1</sup> | 2005–2009,<br>N = 10,559 <sup>1</sup> | 2010–2015,<br>N = 13,532 <sup>1</sup> |                      | Overall, N =<br>18,757 <sup>1</sup> | 1993–1999,<br>N = 4,141 <sup>1</sup> | 2000–2004,<br>N = 3,834 <sup>1</sup> | 2005–2009,<br>N = 4,498 <sup>1</sup> | 2010–2015,<br>N = 6,284 <sup>1</sup> |                      |
| No                  | 23,683<br>(53.7%)                   | 5,657<br>(52.3%)                      | 4,619<br>(50.1%)                     | 5,666<br>(53.7%)                      | 7,741<br>(57.2%)                      |                      | 11,085<br>(59.1%)                   | 2,333<br>(56.3%)                     | 2,174<br>(56.7%)                     | 2,667<br>(59.3%)                     | 3,911<br>(62.2%)                     |                      |
| Unknown/missing     | 6,727 (15.2%)                       | 2,256<br>(20.9%)                      | 2,080<br>(22.6%)                     | 1,403<br>(13.3%)                      | 988 (7.3%)                            |                      | 3,143 (16.8%)                       | 958 (23.1%)                          | 910 (23.7%)                          | 718 (16.0%)                          | 557 (8.9%)                           |                      |
| <b>Radiotherapy</b> |                                     |                                       |                                      |                                       |                                       | <0.001               |                                     |                                      |                                      |                                      |                                      | <0.001               |
| Yes                 | 6,839 (15.5%)                       | 1,721<br>(15.9%)                      | 1,178<br>(12.8%)                     | 1,593<br>(15.1%)                      | 2,347<br>(17.3%)                      |                      | 1,772 (9.4%)                        | 363 (8.8%)                           | 288 (7.5%)                           | 431 (9.6%)                           | 690 (11.0%)                          |                      |
| No                  | 29,967<br>(67.9%)                   | 6,573<br>(60.8%)                      | 5,716<br>(62.0%)                     | 7,500<br>(71.0%)                      | 10,178<br>(75.2%)                     |                      | 13,658<br>(72.8%)                   | 2,707<br>(65.4%)                     | 2,575<br>(67.2%)                     | 3,342<br>(74.3%)                     | 5,034<br>(80.1%)                     |                      |
| Unknown/missing     | 7,307 (16.6%)                       | 2,513<br>(23.3%)                      | 2,321<br>(25.2%)                     | 1,466<br>(13.9%)                      | 1,007 (7.4%)                          |                      | 3,327 (17.7%)                       | 1,071<br>(25.9%)                     | 971 (25.3%)                          | 725 (16.1%)                          | 560 (8.9%)                           |                      |
| <b>Laparoscopic</b> |                                     |                                       |                                      |                                       |                                       | <0.001               |                                     |                                      |                                      |                                      |                                      | <0.001               |
| Yes                 | 3,930 (8.9%)                        | 18 (0.2%)                             | 259 (2.8%)                           | 914 (8.7%)                            | 2,739<br>(20.2%)                      |                      | 2,865 (15.3%)                       | 5 (0.1%)                             | 192 (5.0%)                           | 653 (14.5%)                          | 2,015<br>(32.1%)                     |                      |
| No                  | 27,325<br>(61.9%)                   | 4,188<br>(38.8%)                      | 5,229<br>(56.7%)                     | 8,118<br>(76.9%)                      | 9,790<br>(72.3%)                      |                      | 10,638<br>(56.7%)                   | 1,662<br>(40.1%)                     | 2,162<br>(56.4%)                     | 3,106<br>(69.1%)                     | 3,708<br>(59.0%)                     |                      |
| Unknown/missing     | 12,858<br>(29.1%)                   | 6,601<br>(61.1%)                      | 3,727<br>(40.4%)                     | 1,527<br>(14.5%)                      | 1,003 (7.4%)                          |                      | 5,254 (28.0%)                       | 2,474<br>(59.7%)                     | 1,480<br>(38.6%)                     | 739 (16.4%)                          | 561 (8.9%)                           |                      |

<sup>1</sup>Median [IQR] for Age at diagnosis; Mean ± SD (Range) for Gini coefficient; Frequency (%) for all others (calculated by columns)

<sup>2</sup>Pearson's Chi-squared test

Table S2: Selected covariates of male and female lung cancer cases in three cancer registries in Japan, 1993–2015, by histological type

| Characteristic            | Male                                         |                                                  |                                         |                                            |                                                      |                                                               |                                         | Female                                     |                                                 |                                         |                                            |                                                      |                                                               |                                         | p-value <sup>e2</sup>        |        |
|---------------------------|----------------------------------------------|--------------------------------------------------|-----------------------------------------|--------------------------------------------|------------------------------------------------------|---------------------------------------------------------------|-----------------------------------------|--------------------------------------------|-------------------------------------------------|-----------------------------------------|--------------------------------------------|------------------------------------------------------|---------------------------------------------------------------|-----------------------------------------|------------------------------|--------|
|                           | Small cell carcinoma, N = 4,593 <sup>1</sup> | Squamous cell carcinoma, N = 10,950 <sup>1</sup> | Adenocarcinoma, N = 15,344 <sup>1</sup> | Large cell carcinoma, N = 914 <sup>1</sup> | Other non-small cell carcinoma, N = 603 <sup>1</sup> | Other specified and unspecified types, N = 7,071 <sup>1</sup> | Unknown/missing, N = 4,638 <sup>1</sup> | Small cell carcinoma, N = 822 <sup>1</sup> | Squamous cell carcinoma, N = 1,223 <sup>1</sup> | Adenocarcinoma, N = 10,963 <sup>1</sup> | Large cell carcinoma, N = 182 <sup>1</sup> | Other non-small cell carcinoma, N = 188 <sup>1</sup> | Other specified and unspecified types, N = 3,095 <sup>1</sup> | Unknown/missing, N = 2,284 <sup>1</sup> |                              |        |
| <b>Stage at diagnosis</b> |                                              |                                                  |                                         |                                            |                                                      |                                                               |                                         |                                            |                                                 |                                         |                                            |                                                      |                                                               |                                         | <0.001                       |        |
| Localized                 | 326 (3.5%)                                   | 2,826 (30.5%)                                    | 4,880 (52.7%)                           | 210 (2.3%)                                 | 158 (1.7%)                                           | 659 (7.1%)                                                    | 208 (2.2%)                              | 53 (0.9%)                                  | 280 (4.9%)                                      | 4,886 (84.8%)                           | 34 (0.6%)                                  | 72 (1.2%)                                            | 357 (6.2%)                                                    | 81 (1.4%)                               |                              |        |
| Regional                  | 1,284 (11.4%)                                | 4,081 (36.3%)                                    | 3,930 (35.0%)                           | 295 (2.6%)                                 | 199 (1.8%)                                           | 968 (8.6%)                                                    | 486 (4.3%)                              | 229 (6.8%)                                 | 399 (11.9%)                                     | 2,195 (65.2%)                           | 41 (1.2%)                                  | 50 (1.5%)                                            | 299 (8.9%)                                                    | 154 (4.6%)                              |                              |        |
| Distant                   | 2,247 (16.9%)                                | 2,573 (19.3%)                                    | 5,006 (37.6%)                           | 323 (2.4%)                                 | 179 (1.3%)                                           | 1,730 (13.0%)                                                 | 1,256 (9.4%)                            | 390 (7.7%)                                 | 325 (6.4%)                                      | 2,918 (57.6%)                           | 87 (1.7%)                                  | 47 (0.9%)                                            | 767 (15.1%)                                                   | 532 (10.5%)                             |                              |        |
| Unknown/missing           | 736 (7.2%)                                   | 1,470 (14.3%)                                    | 1,528 (14.9%)                           | 86 (0.8%)                                  | 67 (0.7%)                                            | 3,714 (36.1%)                                                 | 2,688 (26.1%)                           | 150 (3.3%)                                 | 219 (4.8%)                                      | 964 (21.1%)                             | 20 (0.4%)                                  | 19 (0.4%)                                            | 1,672 (36.7%)                                                 | 1,517 (33.3%)                           |                              |        |
| <b>Age at diagnosis</b>   | 72 [66, 78]                                  | 73 [67, 79]                                      | 71 [63, 77]                             | 70 [62, 76]                                | 70 [61, 76]                                          | 80 [73, 85]                                                   | 79 [73, 85]                             | 73 [67, 79]                                | 75 [68, 80]                                     | 71 [63, 78]                             | 71 [63, 78]                                | 70 [61, 79]                                          | 84 [77, 88]                                                   | 84 [77, 89]                             | <0.001                       |        |
| <b>Age categories</b>     |                                              |                                                  |                                         |                                            |                                                      |                                                               |                                         |                                            |                                                 |                                         |                                            |                                                      |                                                               |                                         | <0.001                       |        |
| <50 years                 | 80 (6.5%)                                    | 190 (15.5%)                                      | 714 (58.3%)                             | 61 (5.0%)                                  | 47 (3.8%)                                            | 73 (6.0%)                                                     | 60 (4.9%)                               | 16 (2.2%)                                  | 24 (3.3%)                                       | 583 (79.8%)                             | 18 (2.5%)                                  | 19 (2.6%)                                            | 41 (5.6%)                                                     | 30 (4.1%)                               |                              |        |
| 50–59 years               | 453 (11.3%)                                  | 869 (21.6%)                                      | 1,997 (49.7%)                           | 129 (3.2%)                                 | 96 (2.4%)                                            | 237 (5.9%)                                                    | 235 (5.9%)                              | 76 (3.9%)                                  | 81 (4.2%)                                       | 1,585 (81.6%)                           | 20 (1.0%)                                  | 28 (1.4%)                                            | 89 (4.6%)                                                     | 64 (3.3%)                               |                              |        |
| 60–69 years               | 1,438 (12.7%)                                | 3,022 (26.8%)                                    | 4,736 (42.0%)                           | 284 (2.5%)                                 | 185 (1.6%)                                           | 980 (8.7%)                                                    | 636 (5.6%)                              | 222 (5.5%)                                 | 278 (6.9%)                                      | 3,033 (74.8%)                           | 50 (1.2%)                                  | 47 (1.2%)                                            | 245 (6.0%)                                                    | 179 (4.4%)                              |                              |        |
| 70–79 years               | 1,956 (11.3%)                                | 4,927 (28.6%)                                    | 5,769 (33.4%)                           | 352 (2.0%)                                 | 204 (1.2%)                                           | 2,431 (14.1%)                                                 | 1,614 (9.4%)                            | 346 (5.6%)                                 | 547 (8.8%)                                      | 3,942 (63.3%)                           | 67 (1.1%)                                  | 60 (1.0%)                                            | 729 (11.7%)                                                   | 533 (8.6%)                              |                              |        |
| 80+ years                 | 666 (6.4%)                                   | 1,942 (18.8%)                                    | 2,128 (20.6%)                           | 88 (0.9%)                                  | 71 (0.7%)                                            | 3,350 (32.4%)                                                 | 2,093 (20.2%)                           | 162 (2.8%)                                 | 293 (5.0%)                                      | 1,820 (31.4%)                           | 27 (0.5%)                                  | 34 (0.6%)                                            | 1,991 (34.3%)                                                 | 1,478 (25.5%)                           |                              |        |
| <b>Prefecture</b>         |                                              |                                                  |                                         |                                            |                                                      |                                                               |                                         |                                            |                                                 |                                         |                                            |                                                      |                                                               |                                         | <0.001                       |        |
| Yamagata                  | 1,640 (10.7%)                                | 4,052 (26.4%)                                    | 4,845 (31.6%)                           | 301 (2.0%)                                 | 144 (0.9%)                                           | 4,139 (27.0%)                                                 | 212 (1.4%)                              | 266 (4.5%)                                 | 358 (6.0%)                                      | 3,486 (58.3%)                           | 52 (0.9%)                                  | 49 (0.8%)                                            | 1,727 (28.9%)                                                 | 38 (0.6%)                               |                              |        |
| Fukui                     | 917 (9.5%)                                   | 2,369 (24.5%)                                    | 3,343 (34.6%)                           | 213 (2.2%)                                 | 84 (0.9%)                                            | 2,586 (26.8%)                                                 | 141 (1.5%)                              | 161 (4.0%)                                 | 280 (6.9%)                                      | 2,298 (56.5%)                           | 44 (1.1%)                                  | 25 (0.6%)                                            | 1,213 (29.8%)                                                 | 47 (1.2%)                               |                              |        |
| Nagasaki                  | 2,036 (10.6%)                                | 4,529 (23.7%)                                    | 7,156 (37.4%)                           | 400 (2.1%)                                 | 375 (2.0%)                                           | 346 (1.8%)                                                    | 4,285 (22.4%)                           | 395 (4.5%)                                 | 585 (6.7%)                                      | 5,179 (59.4%)                           | 86 (1.0%)                                  | 114 (1.3%)                                           | 155 (1.8%)                                                    | 2,199 (25.2%)                           |                              |        |
| <b>Gini coefficient</b>   | 0.321 ± 0.030 (0.277, 0.376)                 | 0.320 ± 0.030 (0.277, 0.376)                     | 0.324 ± 0.030 (0.277, 0.376)            | 0.317 ± 0.029 (0.277, 0.376)               | 0.334 ± 0.029 (0.277, 0.376)                         | 0.317 ± 0.032 (0.277, 0.376)                                  | 0.328 ± 0.025 (0.277, 0.376)            | <0.001                                     | 0.322 ± 0.029 (0.277, 0.376)                    | 0.322 ± 0.029 (0.277, 0.376)            | 0.326 ± 0.030 (0.277, 0.376)               | 0.312 ± 0.027 (0.277, 0.376)                         | 0.333 ± 0.030 (0.277, 0.376)                                  | 0.318 ± 0.032 (0.277, 0.376)            | 0.328 ± 0.025 (0.277, 0.376) | <0.001 |
| <b>Period</b>             |                                              |                                                  |                                         |                                            |                                                      |                                                               |                                         |                                            |                                                 |                                         |                                            |                                                      |                                                               |                                         | <0.001                       |        |

| Characteristic                        | Male                                         |                                                  |                                         |                                            |                                                      |                                                               |                                         | Female                                     |                                                 |                                         |                                            |                                                      |                                                               |                                         | p-value <sup>e2</sup> |
|---------------------------------------|----------------------------------------------|--------------------------------------------------|-----------------------------------------|--------------------------------------------|------------------------------------------------------|---------------------------------------------------------------|-----------------------------------------|--------------------------------------------|-------------------------------------------------|-----------------------------------------|--------------------------------------------|------------------------------------------------------|---------------------------------------------------------------|-----------------------------------------|-----------------------|
|                                       | Small cell carcinoma, N = 4,593 <sup>1</sup> | Squamous cell carcinoma, N = 10,950 <sup>1</sup> | Adenocarcinoma, N = 15,344 <sup>1</sup> | Large cell carcinoma, N = 914 <sup>1</sup> | Other non-small cell carcinoma, N = 603 <sup>1</sup> | Other specified and unspecified types, N = 7,071 <sup>1</sup> | Unknown/missing, N = 4,638 <sup>1</sup> | Small cell carcinoma, N = 822 <sup>1</sup> | Squamous cell carcinoma, N = 1,223 <sup>1</sup> | Adenocarcinoma, N = 10,963 <sup>1</sup> | Large cell carcinoma, N = 182 <sup>1</sup> | Other non-small cell carcinoma, N = 188 <sup>1</sup> | Other specified and unspecified types, N = 3,095 <sup>1</sup> | Unknown/missing, N = 2,284 <sup>1</sup> |                       |
| 1993–1999                             | 1,206 (11.2%)                                | 3,001 (27.8%)                                    | 3,403 (31.5%)                           | 304 (2.8%)                                 | 107 (1.0%)                                           | 1,753 (16.2%)                                                 | 1,033 (9.6%)                            | 214 (5.2%)                                 | 318 (7.7%)                                      | 2,243 (54.2%)                           | 72 (1.7%)                                  | 35 (0.8%)                                            | 735 (17.7%)                                                   | 524 (12.7%)                             |                       |
| 2000–2004                             | 988 (10.7%)                                  | 2,273 (24.7%)                                    | 3,103 (33.7%)                           | 203 (2.2%)                                 | 71 (0.8%)                                            | 1,551 (16.8%)                                                 | 1,026 (11.1%)                           | 165 (4.3%)                                 | 250 (6.5%)                                      | 2,161 (56.4%)                           | 51 (1.3%)                                  | 32 (0.8%)                                            | 658 (17.2%)                                                   | 517 (13.5%)                             |                       |
| 2005–2009                             | 1,060 (10.0%)                                | 2,536 (24.0%)                                    | 3,732 (35.3%)                           | 194 (1.8%)                                 | 156 (1.5%)                                           | 1,737 (16.5%)                                                 | 1,144 (10.8%)                           | 201 (4.5%)                                 | 271 (6.0%)                                      | 2,645 (58.8%)                           | 30 (0.7%)                                  | 38 (0.8%)                                            | 735 (16.3%)                                                   | 578 (12.9%)                             |                       |
| 2010–2015                             | 1,339 (9.9%)                                 | 3,140 (23.2%)                                    | 5,106 (37.7%)                           | 213 (1.6%)                                 | 269 (2.0%)                                           | 2,030 (15.0%)                                                 | 1,435 (10.6%)                           | 242 (3.9%)                                 | 384 (6.1%)                                      | 3,914 (62.3%)                           | 29 (0.5%)                                  | 83 (1.3%)                                            | 967 (15.4%)                                                   | 665 (10.6%)                             |                       |
| <b>Death certificate notification</b> | 547 (6.5%)                                   | 912 (10.8%)                                      | 1,004 (11.9%)                           | 61 (0.7%)                                  | 12 (0.1%)                                            | 4,038 (47.9%)                                                 | 1,859 (22.0%)                           | 94 (2.6%)                                  | 113 (3.1%)                                      | 574 (15.7%)                             | 14 (0.4%)                                  | 1 (0.0%)                                             | 1,796 (49.2%)                                                 | 1,060 (29.0%)                           | <0.001                |
| <b>Observation period</b>             |                                              |                                                  |                                         |                                            |                                                      |                                                               |                                         |                                            |                                                 |                                         |                                            |                                                      |                                                               |                                         | <0.001                |
| 0–4 years                             | 4,283 (11.5%)                                | 8,864 (23.7%)                                    | 11,649 (31.2%)                          | 726 (1.9%)                                 | 478 (1.3%)                                           | 6,855 (18.4%)                                                 | 4,501 (12.0%)                           | 747 (5.4%)                                 | 1,008 (7.3%)                                    | 6,707 (48.5%)                           | 148 (1.1%)                                 | 129 (0.9%)                                           | 2,902 (21.0%)                                                 | 2,196 (15.9%)                           |                       |
| 5–9 years                             | 223 (4.6%)                                   | 1,427 (29.5%)                                    | 2,699 (55.7%)                           | 127 (2.6%)                                 | 101 (2.1%)                                           | 167 (3.4%)                                                    | 100 (2.1%)                              | 47 (1.4%)                                  | 136 (4.0%)                                      | 2,946 (86.7%)                           | 23 (0.7%)                                  | 38 (1.1%)                                            | 137 (4.0%)                                                    | 71 (2.1%)                               |                       |
| 10–14 years                           | 55 (4.8%)                                    | 429 (37.1%)                                      | 572 (49.5%)                             | 33 (2.9%)                                  | 11 (1.0%)                                            | 30 (2.6%)                                                     | 26 (2.2%)                               | 16 (1.8%)                                  | 50 (5.6%)                                       | 749 (84.3%)                             | 6 (0.7%)                                   | 12 (1.4%)                                            | 44 (5.0%)                                                     | 11 (1.2%)                               |                       |
| 15+ years                             | 32 (4.2%)                                    | 230 (30.4%)                                      | 424 (56.0%)                             | 28 (3.7%)                                  | 13 (1.7%)                                            | 19 (2.5%)                                                     | 11 (1.5%)                               | 12 (1.9%)                                  | 29 (4.6%)                                       | 561 (88.5%)                             | 5 (0.8%)                                   | 9 (1.4%)                                             | 12 (1.9%)                                                     | 6 (0.9%)                                |                       |
| <b>Screening detected</b>             |                                              |                                                  |                                         |                                            |                                                      |                                                               |                                         |                                            |                                                 |                                         |                                            |                                                      |                                                               |                                         | <0.001                |
| Yes                                   | 324 (8.5%)                                   | 1,169 (30.5%)                                    | 1,868 (48.7%)                           | 93 (2.4%)                                  | 57 (1.5%)                                            | 283 (7.4%)                                                    | 39 (1.0%)                               | 41 (2.0%)                                  | 75 (3.7%)                                       | 1,752 (85.7%)                           | 16 (0.8%)                                  | 29 (1.4%)                                            | 123 (6.0%)                                                    | 9 (0.4%)                                |                       |
| No                                    | 4,184 (11.0%)                                | 9,683 (25.5%)                                    | 13,381 (35.2%)                          | 812 (2.1%)                                 | 545 (1.4%)                                           | 4,775 (12.6%)                                                 | 4,587 (12.1%)                           | 763 (4.8%)                                 | 1,137 (7.2%)                                    | 9,146 (58.1%)                           | 163 (1.0%)                                 | 159 (1.0%)                                           | 2,116 (13.4%)                                                 | 2,271 (14.4%)                           |                       |
| Unknown/missing                       | 85 (3.7%)                                    | 98 (4.2%)                                        | 95 (4.1%)                               | 9 (0.4%)                                   | 1 (0.0%)                                             | 2,013 (87.0%)                                                 | 12 (0.5%)                               | 18 (1.9%)                                  | 11 (1.1%)                                       | 65 (6.8%)                               | 3 (0.3%)                                   | 0 (0.0%)                                             | 856 (89.4%)                                                   | 4 (0.4%)                                |                       |
| <b>Surgery</b>                        |                                              |                                                  |                                         |                                            |                                                      |                                                               |                                         |                                            |                                                 |                                         |                                            |                                                      |                                                               |                                         | <0.001                |
| Yes                                   | 365 (4.1%)                                   | 3,237 (35.9%)                                    | 4,589 (50.9%)                           | 353 (3.9%)                                 | 217 (2.4%)                                           | 116 (1.3%)                                                    | 132 (1.5%)                              | 56 (1.3%)                                  | 291 (6.8%)                                      | 3,730 (86.8%)                           | 56 (1.3%)                                  | 68 (1.6%)                                            | 55 (1.3%)                                                     | 43 (1.0%)                               |                       |
| No                                    | 3,726 (13.2%)                                | 7,003 (24.8%)                                    | 9,917 (35.1%)                           | 481 (1.7%)                                 | 368 (1.3%)                                           | 4,110 (14.5%)                                                 | 2,669 (9.4%)                            | 677 (5.9%)                                 | 847 (7.3%)                                      | 6,774 (58.7%)                           | 109 (0.9%)                                 | 118 (1.0%)                                           | 1,825 (15.8%)                                                 | 1,182 (10.2%)                           |                       |
| Unknown/missing                       | 502 (7.3%)                                   | 710 (10.4%)                                      | 838 (12.3%)                             | 80 (1.2%)                                  | 18 (0.3%)                                            | 2,845 (41.7%)                                                 | 1,837 (26.9%)                           | 89 (3.0%)                                  | 85 (2.9%)                                       | 459 (15.7%)                             | 17 (0.6%)                                  | 2 (0.1%)                                             | 1,215 (41.5%)                                                 | 1,059 (36.2%)                           |                       |
| <b>Chemotherapy</b>                   |                                              |                                                  |                                         |                                            |                                                      |                                                               |                                         |                                            |                                                 |                                         |                                            |                                                      |                                                               |                                         | <0.001                |

| Characteristic      | Male                                         |                                                  |                                         |                                            |                                                      |                                                               |                                            | Female                                     |                                                 |                                         |                                            |                                                      |                                                               |                                            | p-value <sup>2</sup> |
|---------------------|----------------------------------------------|--------------------------------------------------|-----------------------------------------|--------------------------------------------|------------------------------------------------------|---------------------------------------------------------------|--------------------------------------------|--------------------------------------------|-------------------------------------------------|-----------------------------------------|--------------------------------------------|------------------------------------------------------|---------------------------------------------------------------|--------------------------------------------|----------------------|
|                     | Small cell carcinoma, N = 4,593 <sup>1</sup> | Squamous cell carcinoma, N = 10,950 <sup>1</sup> | Adenocarcinoma, N = 15,344 <sup>1</sup> | Large cell carcinoma, N = 914 <sup>1</sup> | Other non-small cell carcinoma, N = 603 <sup>1</sup> | Other specified and unspecified types, N = 7,071 <sup>1</sup> | Unknown/mismissing, N = 4,638 <sup>1</sup> | Small cell carcinoma, N = 822 <sup>1</sup> | Squamous cell carcinoma, N = 1,223 <sup>1</sup> | Adenocarcinoma, N = 10,963 <sup>1</sup> | Large cell carcinoma, N = 182 <sup>1</sup> | Other non-small cell carcinoma, N = 188 <sup>1</sup> | Other specified and unspecified types, N = 3,095 <sup>1</sup> | Unknown/mismissing, N = 2,284 <sup>1</sup> |                      |
| Yes                 | 3,035 (22.1%)                                | 3,573 (26.1%)                                    | 5,496 (40.1%)                           | 354 (2.6%)                                 | 223 (1.6%)                                           | 457 (3.3%)                                                    | 565 (4.1%)                                 | 489 (10.8%)                                | 374 (8.3%)                                      | 3,229 (71.3%)                           | 60 (1.3%)                                  | 51 (1.1%)                                            | 150 (3.3%)                                                    | 176 (3.9%)                                 |                      |
| No                  | 1,285 (5.4%)                                 | 6,576 (27.8%)                                    | 8,874 (37.5%)                           | 491 (2.1%)                                 | 363 (1.5%)                                           | 3,855 (16.3%)                                                 | 2,239 (9.5%)                               | 275 (2.5%)                                 | 750 (6.8%)                                      | 7,014 (63.3%)                           | 104 (0.9%)                                 | 131 (1.2%)                                           | 1,762 (15.9%)                                                 | 1,049 (9.5%)                               |                      |
| Unknown/mismissing  | 273 (4.1%)                                   | 801 (11.9%)                                      | 974 (14.5%)                             | 69 (1.0%)                                  | 17 (0.3%)                                            | 2,759 (41.0%)                                                 | 1,834 (27.3%)                              | 58 (1.8%)                                  | 99 (3.1%)                                       | 720 (22.9%)                             | 18 (0.6%)                                  | 6 (0.2%)                                             | 1,183 (37.6%)                                                 | 1,059 (33.7%)                              |                      |
| <b>Radiotherapy</b> |                                              |                                                  |                                         |                                            |                                                      |                                                               |                                            |                                            |                                                 |                                         |                                            |                                                      |                                                               |                                            |                      |
| Yes                 | 1,135 (16.6%)                                | 2,408 (35.2%)                                    | 2,147 (31.4%)                           | 173 (2.5%)                                 | 69 (1.0%)                                            | 533 (7.8%)                                                    | 374 (5.5%)                                 | 196 (11.1%)                                | 252 (14.2%)                                     | 958 (54.1%)                             | 23 (1.3%)                                  | 21 (1.2%)                                            | 206 (11.6%)                                                   | 116 (6.5%)                                 |                      |
| No                  | 3,010 (10.0%)                                | 7,644 (25.5%)                                    | 11,994 (40.0%)                          | 653 (2.2%)                                 | 517 (1.7%)                                           | 3,720 (12.4%)                                                 | 2,429 (8.1%)                               | 543 (4.0%)                                 | 860 (6.3%)                                      | 9,170 (67.1%)                           | 136 (1.0%)                                 | 161 (1.2%)                                           | 1,678 (12.3%)                                                 | 1,110 (8.1%)                               |                      |
| Unknown/mismissing  | 448 (6.1%)                                   | 898 (12.3%)                                      | 1,203 (16.5%)                           | 88 (1.2%)                                  | 17 (0.2%)                                            | 2,818 (38.6%)                                                 | 1,835 (25.1%)                              | 83 (2.5%)                                  | 111 (3.3%)                                      | 835 (25.1%)                             | 23 (0.7%)                                  | 6 (0.2%)                                             | 1,211 (36.4%)                                                 | 1,058 (31.8%)                              |                      |
| <b>Laparoscopic</b> |                                              |                                                  |                                         |                                            |                                                      |                                                               |                                            |                                            |                                                 |                                         |                                            |                                                      |                                                               |                                            |                      |
| Yes                 | 127 (3.2%)                                   | 966 (24.6%)                                      | 2,579 (65.6%)                           | 93 (2.4%)                                  | 125 (3.2%)                                           | 13 (0.3%)                                                     | 27 (0.7%)                                  | 16 (0.6%)                                  | 100 (3.5%)                                      | 2,680 (93.5%)                           | 15 (0.5%)                                  | 41 (1.4%)                                            | 5 (0.2%)                                                      | 8 (0.3%)                                   |                      |
| No                  | 3,334 (12.2%)                                | 7,242 (26.5%)                                    | 9,809 (35.9%)                           | 558 (2.0%)                                 | 446 (1.6%)                                           | 3,205 (11.7%)                                                 | 2,731 (10.0%)                              | 617 (5.8%)                                 | 854 (8.0%)                                      | 6,353 (59.7%)                           | 111 (1.0%)                                 | 131 (1.2%)                                           | 1,368 (12.9%)                                                 | 1,204 (11.3%)                              |                      |
| Unknown/mismissing  | 1,132 (8.8%)                                 | 2,742 (21.3%)                                    | 2,956 (23.0%)                           | 263 (2.0%)                                 | 32 (0.2%)                                            | 3,853 (30.0%)                                                 | 1,880 (14.6%)                              | 189 (3.6%)                                 | 269 (5.1%)                                      | 1,930 (36.7%)                           | 56 (1.1%)                                  | 16 (0.3%)                                            | 1,722 (32.8%)                                                 | 1,072 (20.4%)                              |                      |

<sup>1</sup>Median [IQR] for Age at diagnosis; Mean ± SD (Range) for Gini coefficient; Frequency (%) for all others (calculated by rows)

<sup>2</sup>Pearson's Chi-squared test; Kruskal-Wallis rank sum test

Table S3: Selected covariates of male and female lung cancer cases in three cancer registries in Japan, 1993–2015, by stage at diagnosis

| Characteristic                        | Male                              |                                   |                                  |                                          |                      | Female                            |                                  |                                 |                                         |                      |
|---------------------------------------|-----------------------------------|-----------------------------------|----------------------------------|------------------------------------------|----------------------|-----------------------------------|----------------------------------|---------------------------------|-----------------------------------------|----------------------|
|                                       | Localized, N = 9,267 <sup>1</sup> | Regional, N = 11,243 <sup>1</sup> | Distant, N = 13,314 <sup>1</sup> | Unknown/missing, N = 10,289 <sup>1</sup> | p-value <sup>2</sup> | Localized, N = 5,763 <sup>1</sup> | Regional, N = 3,367 <sup>1</sup> | Distant, N = 5,066 <sup>1</sup> | Unknown/missing, N = 4,561 <sup>1</sup> | p-value <sup>2</sup> |
| <b>Histological type</b>              |                                   |                                   |                                  |                                          | <0.001               |                                   |                                  |                                 |                                         | <0.001               |
| Small cell carcinoma                  | 326 (7.1%)                        | 1,284 (28.0%)                     | 2,247 (48.9%)                    | 736 (16.0%)                              |                      | 53 (6.4%)                         | 229 (27.9%)                      | 390 (47.4%)                     | 150 (18.2%)                             |                      |
| Squamous cell carcinoma               | 2,826 (25.8%)                     | 4,081 (37.3%)                     | 2,573 (23.5%)                    | 1,470 (13.4%)                            |                      | 280 (22.9%)                       | 399 (32.6%)                      | 325 (26.6%)                     | 219 (17.9%)                             |                      |
| Adenocarcinoma                        | 4,880 (31.8%)                     | 3,930 (25.6%)                     | 5,006 (32.6%)                    | 1,528 (10.0%)                            |                      | 4,886 (44.6%)                     | 2,195 (20.0%)                    | 2,918 (26.6%)                   | 964 (8.8%)                              |                      |
| Large cell carcinoma                  | 210 (23.0%)                       | 295 (32.3%)                       | 323 (35.3%)                      | 86 (9.4%)                                |                      | 34 (18.7%)                        | 41 (22.5%)                       | 87 (47.8%)                      | 20 (11.0%)                              |                      |
| Other non–small cell carcinoma        | 158 (26.2%)                       | 199 (33.0%)                       | 179 (29.7%)                      | 67 (11.1%)                               |                      | 72 (38.3%)                        | 50 (26.6%)                       | 47 (25.0%)                      | 19 (10.1%)                              |                      |
| Other specified and unspecified types | 659 (9.3%)                        | 968 (13.7%)                       | 1,730 (24.5%)                    | 3,714 (52.5%)                            |                      | 357 (11.5%)                       | 299 (9.7%)                       | 767 (24.8%)                     | 1,672 (54.0%)                           |                      |
| Unknown/missing                       | 208 (4.5%)                        | 486 (10.5%)                       | 1,256 (27.1%)                    | 2,688 (58.0%)                            |                      | 81 (3.5%)                         | 154 (6.7%)                       | 532 (23.3%)                     | 1,517 (66.4%)                           |                      |
| <b>Age at diagnosis</b>               | 72 [66, 78]                       | 72 [65, 78]                       | 73 [65, 79]                      | 78 [71, 84]                              | <0.001               | 71 [63, 77]                       | 73 [64, 80]                      | 75 [66, 82]                     | 83 [75, 88]                             | <0.001               |
| <b>Age categories</b>                 |                                   |                                   |                                  |                                          | <0.001               |                                   |                                  |                                 |                                         | <0.001               |
| <50 years                             | 233 (19.0%)                       | 351 (28.7%)                       | 481 (39.3%)                      | 160 (13.1%)                              |                      | 274 (37.5%)                       | 151 (20.7%)                      | 234 (32.0%)                     | 72 (9.8%)                               |                      |
| 50–59 years                           | 933 (23.2%)                       | 1,199 (29.9%)                     | 1,424 (35.5%)                    | 460 (11.5%)                              |                      | 805 (41.4%)                       | 422 (21.7%)                      | 553 (28.5%)                     | 163 (8.4%)                              |                      |
| 60–69 years                           | 2,693 (23.9%)                     | 3,162 (28.0%)                     | 3,761 (33.3%)                    | 1,665 (14.8%)                            |                      | 1,721 (42.5%)                     | 824 (20.3%)                      | 1,070 (26.4%)                   | 439 (10.8%)                             |                      |
| 70–79 years                           | 3,915 (22.7%)                     | 4,602 (26.7%)                     | 4,896 (28.4%)                    | 3,840 (22.3%)                            |                      | 2,140 (34.4%)                     | 1,226 (19.7%)                    | 1,657 (26.6%)                   | 1,201 (19.3%)                           |                      |
| 80+ years                             | 1,493 (14.4%)                     | 1,929 (18.7%)                     | 2,752 (26.6%)                    | 4,164 (40.3%)                            |                      | 823 (14.2%)                       | 744 (12.8%)                      | 1,552 (26.7%)                   | 2,686 (46.3%)                           |                      |
| <b>Prefecture</b>                     |                                   |                                   |                                  |                                          | <0.001               |                                   |                                  |                                 |                                         | <0.001               |
| Yamagata                              | 3,077 (20.1%)                     | 3,901 (25.4%)                     | 4,871 (31.8%)                    | 3,484 (22.7%)                            |                      | 1,821 (30.5%)                     | 1,069 (17.9%)                    | 1,700 (28.4%)                   | 1,386 (23.2%)                           |                      |
| Fukui                                 | 2,365 (24.5%)                     | 2,442 (25.3%)                     | 3,004 (31.1%)                    | 1,842 (19.1%)                            |                      | 1,498 (36.8%)                     | 675 (16.6%)                      | 1,071 (26.3%)                   | 824 (20.3%)                             |                      |
| Nagasaki                              | 3,825 (20.0%)                     | 4,900 (25.6%)                     | 5,439 (28.4%)                    | 4,963 (25.9%)                            |                      | 2,444 (28.1%)                     | 1,623 (18.6%)                    | 2,295 (26.3%)                   | 2,351 (27.0%)                           |                      |
| <b>Gini coefficient</b>               | 0.328 ± 0.030 (0.277, 0.376)      | 0.321 ± 0.030 (0.277, 0.376)      | 0.326 ± 0.031 (0.277, 0.376)     | 0.314 ± 0.026 (0.277, 0.376)             | <0.001               | 0.329 ± 0.030 (0.277, 0.376)      | 0.321 ± 0.029 (0.277, 0.376)     | 0.327 ± 0.031 (0.277, 0.376)    | 0.317 ± 0.027 (0.277, 0.376)            | <0.001               |
| <b>Period</b>                         |                                   |                                   |                                  |                                          | <0.001               |                                   |                                  |                                 |                                         | <0.001               |
| 1993–1999                             | 1,766 (16.3%)                     | 2,904 (26.9%)                     | 2,864 (26.5%)                    | 3,273 (30.3%)                            |                      | 929 (22.4%)                       | 852 (20.6%)                      | 1,017 (24.6%)                   | 1,343 (32.4%)                           |                      |
| 2000–2004                             | 1,596 (17.3%)                     | 2,290 (24.9%)                     | 2,359 (25.6%)                    | 2,970 (32.2%)                            |                      | 979 (25.5%)                       | 730 (19.0%)                      | 945 (24.6%)                     | 1,180 (30.8%)                           |                      |
| 2005–2009                             | 2,227 (21.1%)                     | 2,840 (26.9%)                     | 3,251 (30.8%)                    | 2,241 (21.2%)                            |                      | 1,413 (31.4%)                     | 853 (19.0%)                      | 1,149 (25.5%)                   | 1,083 (24.1%)                           |                      |
| 2010–2015                             | 3,678 (27.2%)                     | 3,209 (23.7%)                     | 4,840 (35.8%)                    | 1,805 (13.3%)                            |                      | 2,442 (38.9%)                     | 932 (14.8%)                      | 1,955 (31.1%)                   | 955 (15.2%)                             |                      |
| <b>Death certificate notification</b> | 308 (3.7%)                        | 887 (10.5%)                       | 1,469 (17.4%)                    | 5,769 (68.4%)                            | <0.001               | 101 (2.8%)                        | 252 (6.9%)                       | 542 (14.8%)                     | 2,757 (75.5%)                           | <0.001               |
| <b>Observation period</b>             |                                   |                                   |                                  |                                          | <0.001               |                                   |                                  |                                 |                                         | <0.001               |
| 0–4 years                             | 5,125 (13.7%)                     | 9,405 (25.2%)                     | 12,997 (34.8%)                   | 9,829 (26.3%)                            |                      | 2,277 (16.5%)                     | 2,511 (18.1%)                    | 4,838 (35.0%)                   | 4,211 (30.4%)                           |                      |
| 5–9 years                             | 2,892 (59.7%)                     | 1,392 (28.7%)                     | 257 (5.3%)                       | 303 (6.3%)                               |                      | 2,316 (68.2%)                     | 665 (19.6%)                      | 194 (5.7%)                      | 223 (6.6%)                              |                      |
| 10–14 years                           | 762 (65.9%)                       | 279 (24.1%)                       | 30 (2.6%)                        | 85 (7.4%)                                |                      | 658 (74.1%)                       | 126 (14.2%)                      | 23 (2.6%)                       | 81 (9.1%)                               |                      |
| 15+ years                             | 488 (64.5%)                       | 167 (22.1%)                       | 30 (4.0%)                        | 72 (9.5%)                                |                      | 512 (80.8%)                       | 65 (10.3%)                       | 11 (1.7%)                       | 46 (7.3%)                               |                      |
| <b>Screening detected</b>             |                                   |                                   |                                  |                                          | <0.001               |                                   |                                  |                                 |                                         | <0.001               |
| Yes                                   | 1,658 (43.3%)                     | 1,166 (30.4%)                     | 745 (19.4%)                      | 264 (6.9%)                               |                      | 1,257 (61.5%)                     | 428 (20.9%)                      | 240 (11.7%)                     | 120 (5.9%)                              |                      |
| No                                    | 7,609 (20.0%)                     | 10,077 (26.5%)                    | 12,569 (33.1%)                   | 7,712 (20.3%)                            |                      | 4,506 (28.6%)                     | 2,939 (18.7%)                    | 4,826 (30.6%)                   | 3,484 (22.1%)                           |                      |
| Unknown/missing                       | 0 (0.0%)                          | 0 (0.0%)                          | 0 (0.0%)                         | 2,313 (100.0%)                           |                      | 0 (0.0%)                          | 0 (0.0%)                         | 0 (0.0%)                        | 957 (100.0%)                            |                      |
| <b>Surgery</b>                        |                                   |                                   |                                  |                                          | <0.001               |                                   |                                  |                                 |                                         | <0.001               |
| Yes                                   | 4,323 (48.0%)                     | 3,572 (39.6%)                     | 791 (8.8%)                       | 323 (3.6%)                               |                      | 2,632 (61.2%)                     | 1,223 (28.4%)                    | 302 (7.0%)                      | 142 (3.3%)                              |                      |

| Characteristic      | Male                                 |                                      |                                     |                                             |                          | Female                               |                                     |                                    |                                            |                          |
|---------------------|--------------------------------------|--------------------------------------|-------------------------------------|---------------------------------------------|--------------------------|--------------------------------------|-------------------------------------|------------------------------------|--------------------------------------------|--------------------------|
|                     | Localized, N =<br>9,267 <sup>1</sup> | Regional, N =<br>11,243 <sup>1</sup> | Distant, N =<br>13,314 <sup>1</sup> | Unknown/missing, N<br>= 10,289 <sup>1</sup> | p-<br>value <sup>2</sup> | Localized, N =<br>5,763 <sup>1</sup> | Regional, N =<br>3,367 <sup>1</sup> | Distant, N =<br>5,066 <sup>1</sup> | Unknown/missing, N<br>= 4,561 <sup>1</sup> | p-<br>value <sup>2</sup> |
| No                  | 4,812 (17.0%)                        | 7,191 (25.4%)                        | 11,869<br>(42.0%)                   | 4,402 (15.6%)                               |                          | 3,085 (26.8%)                        | 2,031 (17.6%)                       | 4,579 (39.7%)                      | 1,837 (15.9%)                              |                          |
| Unknown/missing     | 132 (1.9%)                           | 480 (7.0%)                           | 654 (9.6%)                          | 5,564 (81.5%)                               |                          | 46 (1.6%)                            | 113 (3.9%)                          | 185 (6.3%)                         | 2,582 (88.2%)                              |                          |
| <b>Chemotherapy</b> |                                      |                                      |                                     |                                             | <0.001                   |                                      |                                     |                                    |                                            | <0.001                   |
| Yes                 | 1,358 (9.9%)                         | 5,127 (37.4%)                        | 6,520 (47.6%)                       | 698 (5.1%)                                  |                          | 605 (13.4%)                          | 1,408 (31.1%)                       | 2,310 (51.0%)                      | 206 (4.5%)                                 |                          |
| No                  | 7,413 (31.3%)                        | 5,718 (24.1%)                        | 6,462 (27.3%)                       | 4,090 (17.3%)                               |                          | 4,844 (43.7%)                        | 1,824 (16.5%)                       | 2,643 (23.8%)                      | 1,774 (16.0%)                              |                          |
| Unknown/missing     | 496 (7.4%)                           | 398 (5.9%)                           | 332 (4.9%)                          | 5,501 (81.8%)                               |                          | 314 (10.0%)                          | 135 (4.3%)                          | 113 (3.6%)                         | 2,581 (82.1%)                              |                          |
| <b>Radiotherapy</b> |                                      |                                      |                                     |                                             | <0.001                   |                                      |                                     |                                    |                                            | <0.001                   |
| Yes                 | 985 (14.4%)                          | 2,597 (38.0%)                        | 2,944 (43.0%)                       | 313 (4.6%)                                  |                          | 324 (18.3%)                          | 491 (27.7%)                         | 901 (50.8%)                        | 56 (3.2%)                                  |                          |
| No                  | 7,722 (25.8%)                        | 8,037 (26.8%)                        | 9,803 (32.7%)                       | 4,405 (14.7%)                               |                          | 5,096 (37.3%)                        | 2,681 (19.6%)                       | 3,988 (29.2%)                      | 1,893 (13.9%)                              |                          |
| Unknown/missing     | 560 (7.7%)                           | 609 (8.3%)                           | 567 (7.8%)                          | 5,571 (76.2%)                               |                          | 343 (10.3%)                          | 195 (5.9%)                          | 177 (5.3%)                         | 2,612 (78.5%)                              |                          |
| <b>Laparoscopic</b> |                                      |                                      |                                     |                                             | <0.001                   |                                      |                                     |                                    |                                            | <0.001                   |
| Yes                 | 2,887 (73.5%)                        | 918 (23.4%)                          | 99 (2.5%)                           | 26 (0.7%)                                   |                          | 2,356 (82.2%)                        | 449 (15.7%)                         | 55 (1.9%)                          | 5 (0.2%)                                   |                          |
| No                  | 4,894 (17.9%)                        | 7,928 (29.0%)                        | 10,677<br>(39.1%)                   | 3,826 (14.0%)                               |                          | 2,593 (24.4%)                        | 2,279 (21.4%)                       | 4,176 (39.3%)                      | 1,590 (14.9%)                              |                          |
| Unknown/missing     | 1,486 (11.6%)                        | 2,397 (18.6%)                        | 2,538 (19.7%)                       | 6,437 (50.1%)                               |                          | 814 (15.5%)                          | 639 (12.2%)                         | 835 (15.9%)                        | 2,966 (56.5%)                              |                          |

<sup>1</sup>Median [IQR] for Age at diagnosis; Mean ± SD (Range) for Gini coefficient; Frequency (%) for all others (calculated by rows)

<sup>2</sup>Pearson's Chi-squared test; Kruskal-Wallis rank sum test



Table S4: ASIRs of lung cancer in three cancer registries in Japan by genders, 1993–2015

| Year at diagnosis | Age-standardized Incidence Rates (per 100,000 person-years) |                     |                     |
|-------------------|-------------------------------------------------------------|---------------------|---------------------|
|                   | Overall                                                     | Male                | Female              |
| 1993              | 41.3 (39.4 to 43.2)                                         | 62.8 (59.5 to 66.2) | 21.5 (19.6 to 23.4) |
| 1994              | 40.5 (38.7 to 42.4)                                         | 61.0 (57.8 to 64.4) | 21.6 (19.8 to 23.6) |
| 1995              | 42.0 (40.2 to 43.9)                                         | 63.0 (59.8 to 66.3) | 22.6 (20.7 to 24.6) |
| 1996              | 42.9 (41.0 to 44.8)                                         | 63.2 (60.0 to 66.5) | 23.9 (22.0 to 25.9) |
| 1997              | 45.3 (43.4 to 47.2)                                         | 68.0 (64.8 to 71.4) | 23.8 (21.9 to 25.8) |
| 1998              | 43.0 (41.2 to 44.9)                                         | 64.0 (60.9 to 67.3) | 23.2 (21.3 to 25.1) |
| 1999              | 44.9 (43.1 to 46.8)                                         | 66.8 (63.7 to 70.1) | 24.4 (22.4 to 26.4) |
| 2000              | 42.9 (41.2 to 44.8)                                         | 63.1 (60.1 to 66.3) | 23.6 (21.7 to 25.6) |
| 2001              | 44.1 (42.3 to 45.9)                                         | 64.1 (61.0 to 67.3) | 24.8 (22.9 to 26.8) |
| 2002              | 44.8 (43.0 to 46.6)                                         | 64.5 (61.5 to 67.6) | 25.7 (23.8 to 27.7) |
| 2003              | 46.6 (44.8 to 48.5)                                         | 67.1 (64.0 to 70.2) | 26.7 (24.8 to 28.7) |
| 2004              | 47.4 (45.6 to 49.3)                                         | 67.3 (64.3 to 70.4) | 27.8 (25.9 to 29.9) |
| 2005              | 44.9 (43.1 to 46.7)                                         | 65.1 (62.1 to 68.2) | 24.8 (23.0 to 26.8) |
| 2006              | 47.0 (45.2 to 48.8)                                         | 65.6 (62.7 to 68.7) | 28.1 (26.2 to 30.2) |
| 2007              | 45.9 (44.1 to 47.8)                                         | 66.7 (63.7 to 69.9) | 24.6 (22.7 to 26.5) |
| 2008              | 49.3 (47.4 to 51.2)                                         | 69.3 (66.2 to 72.4) | 28.7 (26.7 to 30.8) |
| 2009              | 49.6 (47.7 to 51.5)                                         | 67.6 (64.6 to 70.7) | 30.8 (28.7 to 33.0) |
| 2010              | 50.9 (49.0 to 52.8)                                         | 69.5 (66.5 to 72.7) | 31.2 (29.1 to 33.4) |
| 2011              | 50.1 (48.2 to 52.0)                                         | 67.5 (64.5 to 70.6) | 31.5 (29.4 to 33.8) |
| 2012              | 50.8 (48.9 to 52.7)                                         | 67.5 (64.5 to 70.6) | 32.9 (30.7 to 35.1) |
| 2013              | 49.2 (47.3 to 51.0)                                         | 65.7 (62.8 to 68.8) | 31.2 (29.1 to 33.4) |
| 2014              | 49.6 (47.7 to 51.5)                                         | 65.8 (62.9 to 68.9) | 31.7 (29.6 to 33.9) |
| 2015              | 46.6 (44.8 to 48.4)                                         | 61.9 (59.0 to 64.9) | 29.6 (27.5 to 31.8) |

Notes: ASIRs=Age-standardized incidence rates expressed per 100,000 person-years using the "Standard Japanese Population in 1985"; Three Japanese cancer registries are in Yamagata, Fukui and Nagasaki prefectures.

Table S5: Completed and imputed ASIRs of lung cancer in three cancer registries in Japan, 1993–2015, by histological type

| Histological type       | Year at diagnosis | Completed ASIRs (per 100,000 person-years) |                     |                  | Imputed ASIRs (per 100,000 person-years) |                     |                  |
|-------------------------|-------------------|--------------------------------------------|---------------------|------------------|------------------------------------------|---------------------|------------------|
|                         |                   | Overall                                    | Male                | Female           | Overall                                  | Male                | Female           |
| Small cell carcinoma    | 1993              | 3.6 (3.1 to 4.2)                           | 6.4 (5.3 to 7.5)    | 1.1 (0.7 to 1.6) | 4.4 (3.4 to 5.6)                         | 7.6 (5.8 to 9.7)    | 1.5 (0.7 to 2.5) |
|                         | 1994              | 3.9 (3.3 to 4.5)                           | 6.8 (5.7 to 8.0)    | 1.2 (0.8 to 1.6) | 4.6 (3.7 to 5.7)                         | 7.9 (6.2 to 10.0)   | 1.5 (0.9 to 2.2) |
|                         | 1995              | 3.9 (3.4 to 4.6)                           | 6.8 (5.7 to 8.0)    | 1.3 (0.9 to 1.8) | 4.6 (3.8 to 5.5)                         | 7.9 (6.3 to 9.6)    | 1.5 (0.9 to 2.3) |
|                         | 1996              | 4.1 (3.6 to 4.8)                           | 7.4 (6.4 to 8.6)    | 1.0 (0.7 to 1.5) | 4.8 (4.1 to 5.6)                         | 8.4 (7.0 to 9.9)    | 1.4 (0.8 to 2.1) |
|                         | 1997              | 4.7 (4.1 to 5.4)                           | 8.3 (7.2 to 9.6)    | 1.2 (0.8 to 1.7) | 5.5 (4.5 to 6.6)                         | 9.6 (7.7 to 11.8)   | 1.5 (0.8 to 2.4) |
|                         | 1998              | 4.6 (4.0 to 5.2)                           | 7.6 (6.5 to 8.8)    | 1.6 (1.1 to 2.2) | 5.1 (4.3 to 6.0)                         | 8.5 (7.0 to 10.3)   | 1.9 (1.1 to 2.8) |
|                         | 1999              | 4.1 (3.6 to 4.7)                           | 7.2 (6.2 to 8.3)    | 1.1 (0.7 to 1.5) | 4.8 (3.9 to 5.7)                         | 8.4 (6.9 to 10.0)   | 1.3 (0.8 to 2.0) |
|                         | 2000              | 4.5 (4.0 to 5.1)                           | 7.8 (6.8 to 9.0)    | 1.3 (0.9 to 1.7) | 5.2 (4.4 to 6.1)                         | 9.0 (7.4 to 10.8)   | 1.5 (1.0 to 2.1) |
|                         | 2001              | 3.7 (3.2 to 4.3)                           | 6.6 (5.6 to 7.7)    | 0.9 (0.6 to 1.3) | 4.5 (3.6 to 5.4)                         | 7.8 (6.3 to 9.6)    | 1.2 (0.6 to 1.9) |
|                         | 2002              | 4.0 (3.5 to 4.6)                           | 6.9 (5.9 to 8.0)    | 1.2 (0.8 to 1.7) | 4.6 (3.9 to 5.4)                         | 7.9 (6.5 to 9.5)    | 1.5 (0.9 to 2.1) |
|                         | 2003              | 4.0 (3.5 to 4.6)                           | 6.9 (5.9 to 7.9)    | 1.2 (0.8 to 1.6) | 4.7 (4.0 to 5.5)                         | 8.0 (6.6 to 9.6)    | 1.5 (0.9 to 2.3) |
|                         | 2004              | 4.3 (3.8 to 4.9)                           | 7.6 (6.6 to 8.7)    | 1.1 (0.7 to 1.5) | 5.0 (4.3 to 5.8)                         | 8.7 (7.2 to 10.3)   | 1.4 (0.9 to 2.0) |
|                         | 2005              | 4.5 (4.0 to 5.1)                           | 7.4 (6.4 to 8.5)    | 1.6 (1.2 to 2.2) | 5.1 (4.4 to 5.9)                         | 8.3 (7.0 to 9.8)    | 1.9 (1.3 to 2.5) |
|                         | 2006              | 4.0 (3.5 to 4.6)                           | 6.8 (5.8 to 7.8)    | 1.2 (0.9 to 1.7) | 4.7 (3.9 to 5.5)                         | 7.8 (6.4 to 9.3)    | 1.4 (1.0 to 2.1) |
|                         | 2007              | 4.1 (3.5 to 4.6)                           | 6.8 (5.8 to 7.8)    | 1.2 (0.8 to 1.7) | 4.6 (4.0 to 5.3)                         | 7.7 (6.4 to 9.2)    | 1.4 (0.9 to 2.1) |
|                         | 2008              | 3.9 (3.4 to 4.5)                           | 6.6 (5.7 to 7.6)    | 1.1 (0.8 to 1.6) | 4.5 (3.7 to 5.4)                         | 7.5 (6.1 to 9.0)    | 1.4 (0.8 to 2.0) |
|                         | 2009              | 4.6 (4.1 to 5.2)                           | 7.8 (6.8 to 8.9)    | 1.3 (0.9 to 1.7) | 5.2 (4.5 to 5.9)                         | 8.7 (7.4 to 10.0)   | 1.5 (1.0 to 2.3) |
|                         | 2010              | 4.2 (3.6 to 4.7)                           | 7.2 (6.2 to 8.2)    | 1.0 (0.6 to 1.4) | 4.8 (4.0 to 5.6)                         | 8.2 (6.8 to 9.7)    | 1.2 (0.7 to 1.7) |
|                         | 2011              | 4.4 (3.9 to 5.0)                           | 7.5 (6.6 to 8.6)    | 1.1 (0.8 to 1.6) | 5.0 (4.2 to 5.8)                         | 8.5 (7.2 to 9.9)    | 1.3 (0.8 to 1.9) |
|                         | 2012              | 4.5 (4.0 to 5.1)                           | 7.2 (6.3 to 8.2)    | 1.6 (1.2 to 2.2) | 5.0 (4.3 to 5.7)                         | 7.9 (6.8 to 9.2)    | 1.8 (1.2 to 2.5) |
|                         | 2013              | 3.8 (3.3 to 4.4)                           | 6.4 (5.5 to 7.4)    | 1.1 (0.8 to 1.6) | 4.3 (3.7 to 5.0)                         | 7.1 (6.0 to 8.4)    | 1.3 (0.9 to 1.8) |
|                         | 2014              | 4.4 (3.8 to 4.9)                           | 6.9 (6.0 to 7.9)    | 1.5 (1.1 to 2.0) | 4.8 (4.1 to 5.5)                         | 7.6 (6.3 to 9.1)    | 1.7 (1.2 to 2.3) |
|                         | 2015              | 4.0 (3.5 to 4.6)                           | 6.2 (5.4 to 7.2)    | 1.6 (1.1 to 2.1) | 4.4 (3.7 to 5.1)                         | 6.9 (5.7 to 8.2)    | 1.7 (1.1 to 2.3) |
| Squamous cell carcinoma | 1993              | 9.9 (9.0 to 10.8)                          | 18.9 (17.1 to 20.8) | 1.5 (1.0 to 2.0) | 11.0 (9.9 to 12.3)                       | 21.0 (18.8 to 23.4) | 1.8 (1.1 to 2.7) |
|                         | 1994              | 8.5 (7.7 to 9.4)                           | 16.2 (14.5 to 17.9) | 1.3 (0.9 to 1.9) | 9.5 (8.4 to 10.8)                        | 18.0 (15.8 to 20.3) | 1.6 (1.0 to 2.4) |
|                         | 1995              | 9.6 (8.7 to 10.5)                          | 17.6 (15.9 to 19.4) | 2.1 (1.5 to 2.7) | 10.6 (9.5 to 11.8)                       | 19.5 (17.3 to 21.9) | 2.3 (1.6 to 3.2) |
|                         | 1996              | 9.5 (8.6 to 10.4)                          | 17.5 (15.8 to 19.3) | 2.0 (1.4 to 2.6) | 10.5 (9.4 to 11.6)                       | 19.3 (17.2 to 21.4) | 2.3 (1.6 to 3.1) |
|                         | 1997              | 9.9 (9.0 to 10.8)                          | 18.0 (16.4 to 19.8) | 2.1 (1.6 to 2.7) | 11.1 (10.0 to 12.2)                      | 20.3 (18.1 to 22.6) | 2.4 (1.6 to 3.3) |
|                         | 1998              | 10.1 (9.3 to 11.0)                         | 19.2 (17.5 to 21.0) | 1.6 (1.1 to 2.1) | 11.1 (9.9 to 12.3)                       | 21.0 (18.7 to 23.4) | 1.8 (1.1 to 2.7) |
|                         | 1999              | 9.4 (8.6 to 10.3)                          | 17.6 (16.0 to 19.3) | 1.7 (1.3 to 2.3) | 10.6 (9.5 to 11.8)                       | 19.8 (17.6 to 22.1) | 2.0 (1.4 to 2.7) |
|                         | 2000              | 8.8 (8.0 to 9.6)                           | 16.8 (15.2 to 18.5) | 1.0 (0.7 to 1.4) | 9.9 (8.7 to 11.2)                        | 19.0 (16.7 to 21.4) | 1.3 (0.7 to 2.0) |
|                         | 2001              | 9.0 (8.2 to 9.9)                           | 16.3 (14.8 to 17.9) | 2.0 (1.5 to 2.6) | 10.3 (9.2 to 11.4)                       | 18.5 (16.4 to 20.8) | 2.3 (1.6 to 3.2) |
|                         | 2002              | 9.0 (8.2 to 9.9)                           | 16.3 (14.8 to 17.9) | 1.9 (1.4 to 2.5) | 10.1 (8.9 to 11.3)                       | 18.3 (16.1 to 20.6) | 2.2 (1.5 to 3.0) |
|                         | 2003              | 8.7 (8.0 to 9.5)                           | 15.7 (14.3 to 17.2) | 1.8 (1.3 to 2.3) | 10.0 (9.0 to 11.1)                       | 18.1 (16.0 to 20.3) | 2.2 (1.5 to 3.0) |
|                         | 2004              | 8.6 (7.8 to 9.4)                           | 15.5 (14.1 to 17.0) | 1.7 (1.3 to 2.2) | 10.0 (8.8 to 11.3)                       | 18.1 (15.9 to 20.5) | 2.0 (1.4 to 2.8) |
|                         | 2005              | 7.9 (7.2 to 8.6)                           | 14.5 (13.2 to 16.0) | 1.3 (0.9 to 1.8) | 9.0 (8.1 to 9.9)                         | 16.5 (14.8 to 18.3) | 1.6 (1.0 to 2.3) |
|                         | 2006              | 8.8 (8.1 to 9.6)                           | 16.0 (14.6 to 17.6) | 1.6 (1.1 to 2.1) | 10.0 (8.9 to 11.2)                       | 18.1 (16.2 to 20.3) | 1.9 (1.2 to 2.7) |
|                         | 2007              | 9.5 (8.7 to 10.3)                          | 17.0 (15.5 to 18.6) | 1.8 (1.3 to 2.3) | 10.7 (9.5 to 11.9)                       | 19.2 (17.1 to 21.4) | 2.0 (1.4 to 2.8) |
|                         | 2008              | 9.2 (8.4 to 10.0)                          | 16.6 (15.2 to 18.1) | 1.4 (1.0 to 1.9) | 10.3 (9.2 to 11.5)                       | 18.7 (16.7 to 20.8) | 1.7 (1.1 to 2.3) |
|                         | 2009              | 9.0 (8.3 to 9.8)                           | 15.8 (14.4 to 17.3) | 2.0 (1.5 to 2.5) | 10.2 (9.2 to 11.3)                       | 18.0 (16.2 to 19.9) | 2.3 (1.7 to 3.0) |
|                         | 2010              | 9.6 (8.8 to 10.4)                          | 16.7 (15.2 to 18.2) | 2.2 (1.7 to 2.8) | 11.0 (10.0 to 12.0)                      | 19.1 (17.3 to 21.1) | 2.5 (1.8 to 3.3) |
|                         | 2011              | 9.5 (8.7 to 10.3)                          | 16.3 (14.9 to 17.8) | 2.2 (1.7 to 2.8) | 10.6 (9.6 to 11.6)                       | 18.4 (16.5 to 20.3) | 2.5 (1.9 to 3.2) |
|                         | 2012              | 9.5 (8.7 to 10.3)                          | 16.9 (15.5 to 18.5) | 1.6 (1.2 to 2.1) | 10.5 (9.5 to 11.6)                       | 18.7 (16.8 to 20.7) | 1.8 (1.3 to 2.5) |
|                         | 2013              | 8.7 (7.9 to 9.5)                           | 14.8 (13.5 to 16.3) | 2.1 (1.6 to 2.7) | 9.7 (8.8 to 10.6)                        | 16.6 (15.1 to 18.3) | 2.3 (1.7 to 3.0) |
|                         | 2014              | 8.6 (7.8 to 9.4)                           | 14.8 (13.5 to 16.3) | 1.7 (1.3 to 2.3) | 9.6 (8.6 to 10.6)                        | 16.6 (14.8 to 18.6) | 1.9 (1.4 to 2.6) |

| Histological type    | Year at diagnosis | Completed ASIRs (per 100,000 person-years) |                     |                     | Imputed ASIRs (per 100,000 person-years) |                     |                     |
|----------------------|-------------------|--------------------------------------------|---------------------|---------------------|------------------------------------------|---------------------|---------------------|
|                      |                   | Overall                                    | Male                | Female              | Overall                                  | Male                | Female              |
|                      | 2015              | 8.2 (7.5 to 9.0)                           | 14.0 (12.7 to 15.4) | 1.7 (1.3 to 2.3)    | 9.0 (8.0 to 9.9)                         | 15.4 (13.8 to 17.2) | 1.9 (1.4 to 2.5)    |
| Adenocarcinoma       | 1993              | 14.3 (13.2 to 15.5)                        | 17.4 (15.7 to 19.3) | 11.4 (10.1 to 12.9) | 16.9 (15.2 to 18.7)                      | 20.2 (17.5 to 23.1) | 13.7 (12.0 to 15.6) |
|                      | 1994              | 15.9 (14.7 to 17.1)                        | 19.5 (17.6 to 21.4) | 12.6 (11.2 to 14.2) | 17.9 (16.4 to 19.5)                      | 21.7 (19.4 to 24.2) | 14.5 (12.6 to 16.4) |
|                      | 1995              | 16.3 (15.2 to 17.5)                        | 20.3 (18.4 to 22.2) | 12.7 (11.3 to 14.2) | 18.3 (16.6 to 20.0)                      | 22.7 (20.0 to 25.6) | 14.2 (12.5 to 16.0) |
|                      | 1996              | 16.6 (15.4 to 17.8)                        | 19.9 (18.1 to 21.8) | 13.4 (12.0 to 15.0) | 18.7 (17.3 to 20.1)                      | 22.0 (19.8 to 24.4) | 15.5 (13.8 to 17.3) |
|                      | 1997              | 18.2 (16.9 to 19.4)                        | 22.9 (20.9 to 24.9) | 13.6 (12.2 to 15.2) | 20.7 (19.1 to 22.3)                      | 25.7 (23.3 to 28.2) | 15.8 (13.9 to 17.9) |
|                      | 1998              | 18.0 (16.8 to 19.2)                        | 21.6 (19.8 to 23.6) | 14.4 (12.9 to 16.0) | 19.7 (18.2 to 21.2)                      | 23.6 (21.1 to 26.3) | 15.9 (14.1 to 17.8) |
|                      | 1999              | 19.4 (18.2 to 20.7)                        | 24.4 (22.5 to 26.5) | 14.7 (13.1 to 16.3) | 21.5 (19.9 to 23.3)                      | 26.9 (24.1 to 29.8) | 16.5 (14.8 to 18.3) |
|                      | 2000              | 17.8 (16.6 to 19.0)                        | 21.3 (19.5 to 23.2) | 14.3 (12.8 to 15.9) | 19.9 (18.4 to 21.5)                      | 23.9 (21.5 to 26.5) | 16.0 (14.3 to 17.8) |
|                      | 2001              | 19.1 (17.9 to 20.4)                        | 23.5 (21.6 to 25.6) | 14.8 (13.3 to 16.4) | 21.6 (20.2 to 23.2)                      | 26.4 (23.9 to 29.0) | 17.0 (15.2 to 18.9) |
|                      | 2002              | 19.5 (18.3 to 20.8)                        | 22.7 (20.9 to 24.7) | 16.3 (14.7 to 18.0) | 21.6 (20.2 to 23.2)                      | 25.4 (23.0 to 27.8) | 17.9 (16.2 to 19.9) |
|                      | 2003              | 21.2 (19.9 to 22.5)                        | 25.4 (23.5 to 27.5) | 16.9 (15.3 to 18.6) | 23.8 (22.3 to 25.5)                      | 28.3 (25.8 to 31.0) | 19.4 (17.5 to 21.4) |
|                      | 2004              | 21.5 (20.2 to 22.8)                        | 24.3 (22.4 to 26.3) | 18.6 (16.9 to 20.4) | 24.2 (22.6 to 25.7)                      | 27.5 (25.1 to 30.2) | 20.7 (18.8 to 22.6) |
|                      | 2005              | 20.8 (19.5 to 22.1)                        | 25.5 (23.5 to 27.5) | 16.0 (14.5 to 17.6) | 23.0 (21.4 to 24.6)                      | 28.1 (25.7 to 30.7) | 17.7 (16.0 to 19.5) |
|                      | 2006              | 22.1 (20.8 to 23.4)                        | 25.0 (23.2 to 27.1) | 18.9 (17.2 to 20.7) | 24.5 (23.0 to 26.2)                      | 28.0 (25.5 to 30.7) | 20.8 (19.0 to 22.8) |
|                      | 2007              | 21.2 (20.0 to 22.5)                        | 25.7 (23.8 to 27.7) | 16.4 (14.9 to 18.1) | 23.5 (22.0 to 25.1)                      | 28.4 (25.8 to 31.0) | 18.3 (16.5 to 20.2) |
|                      | 2008              | 24.5 (23.1 to 25.9)                        | 28.0 (25.9 to 30.1) | 20.7 (19.0 to 22.6) | 26.7 (25.1 to 28.5)                      | 30.9 (28.3 to 33.6) | 22.3 (20.3 to 24.3) |
|                      | 2009              | 24.6 (23.3 to 26.0)                        | 27.3 (25.4 to 29.4) | 21.5 (19.7 to 23.4) | 27.1 (25.5 to 28.8)                      | 30.1 (27.7 to 32.7) | 23.7 (21.7 to 25.8) |
|                      | 2010              | 25.4 (24.0 to 26.8)                        | 28.1 (26.1 to 30.2) | 22.3 (20.5 to 24.2) | 27.8 (26.2 to 29.5)                      | 31.3 (28.8 to 33.9) | 24.0 (22.0 to 26.0) |
|                      | 2011              | 25.5 (24.1 to 27.0)                        | 27.6 (25.7 to 29.7) | 22.9 (21.0 to 24.9) | 27.8 (26.2 to 29.5)                      | 30.6 (28.2 to 33.2) | 24.4 (22.4 to 26.5) |
|                      | 2012              | 26.7 (25.2 to 28.1)                        | 28.6 (26.6 to 30.8) | 24.2 (22.3 to 26.2) | 28.7 (27.1 to 30.5)                      | 30.9 (28.6 to 33.4) | 26.0 (23.9 to 28.3) |
|                      | 2013              | 26.4 (25.0 to 27.9)                        | 29.4 (27.4 to 31.6) | 22.8 (20.9 to 24.8) | 28.4 (26.8 to 30.0)                      | 31.9 (29.6 to 34.3) | 24.2 (22.3 to 26.2) |
|                      | 2014              | 25.8 (24.4 to 27.2)                        | 27.7 (25.7 to 29.8) | 23.2 (21.3 to 25.2) | 27.9 (26.2 to 29.6)                      | 30.5 (28.0 to 33.1) | 24.6 (22.6 to 26.6) |
|                      | 2015              | 25.2 (23.8 to 26.6)                        | 28.0 (26.0 to 30.1) | 21.8 (20.0 to 23.8) | 26.7 (25.1 to 28.4)                      | 30.1 (27.8 to 32.7) | 22.6 (20.7 to 24.7) |
| Large cell carcinoma | 1993              | 1.1 (0.8 to 1.4)                           | 1.8 (1.3 to 2.5)    | 0.4 (0.2 to 0.7)    | 1.2 (0.8 to 1.8)                         | 2.1 (1.3 to 3.0)    | 0.5 (0.2 to 0.9)    |
|                      | 1994              | 1.1 (0.8 to 1.4)                           | 1.9 (1.4 to 2.6)    | 0.2 (0.1 to 0.5)    | 1.2 (0.8 to 1.7)                         | 2.1 (1.4 to 3.1)    | 0.3 (0.1 to 0.6)    |
|                      | 1995              | 1.0 (0.8 to 1.4)                           | 1.6 (1.1 to 2.3)    | 0.5 (0.3 to 0.8)    | 1.2 (0.7 to 1.7)                         | 1.8 (1.1 to 2.8)    | 0.5 (0.2 to 1.0)    |
|                      | 1996              | 1.2 (0.9 to 1.5)                           | 2.0 (1.4 to 2.7)    | 0.4 (0.2 to 0.7)    | 1.3 (0.9 to 1.8)                         | 2.2 (1.4 to 3.0)    | 0.5 (0.1 to 1.0)    |
|                      | 1997              | 1.3 (1.0 to 1.6)                           | 2.0 (1.4 to 2.6)    | 0.6 (0.3 to 0.9)    | 1.4 (1.0 to 1.9)                         | 2.2 (1.5 to 3.2)    | 0.6 (0.3 to 1.0)    |
|                      | 1998              | 1.1 (0.8 to 1.5)                           | 1.9 (1.4 to 2.6)    | 0.4 (0.2 to 0.7)    | 1.2 (0.9 to 1.7)                         | 2.1 (1.4 to 2.9)    | 0.4 (0.1 to 0.8)    |
|                      | 1999              | 1.3 (1.0 to 1.6)                           | 2.1 (1.6 to 2.8)    | 0.5 (0.3 to 0.9)    | 1.4 (1.0 to 1.9)                         | 2.3 (1.5 to 3.2)    | 0.6 (0.3 to 1.0)    |
|                      | 2000              | 0.8 (0.6 to 1.1)                           | 1.2 (0.8 to 1.7)    | 0.5 (0.2 to 0.8)    | 0.9 (0.6 to 1.4)                         | 1.4 (0.8 to 2.1)    | 0.5 (0.2 to 1.0)    |
|                      | 2001              | 1.0 (0.8 to 1.4)                           | 1.7 (1.2 to 2.3)    | 0.4 (0.2 to 0.6)    | 1.2 (0.8 to 1.7)                         | 2.0 (1.3 to 2.9)    | 0.4 (0.2 to 0.8)    |
|                      | 2002              | 1.0 (0.8 to 1.4)                           | 1.7 (1.2 to 2.3)    | 0.4 (0.2 to 0.7)    | 1.1 (0.8 to 1.6)                         | 1.8 (1.2 to 2.6)    | 0.4 (0.2 to 0.8)    |
|                      | 2003              | 1.1 (0.9 to 1.5)                           | 2.0 (1.5 to 2.6)    | 0.3 (0.1 to 0.5)    | 1.3 (0.9 to 1.7)                         | 2.2 (1.5 to 3.0)    | 0.3 (0.1 to 0.7)    |
|                      | 2004              | 0.9 (0.6 to 1.1)                           | 1.4 (1.0 to 2.0)    | 0.3 (0.1 to 0.6)    | 1.0 (0.6 to 1.5)                         | 1.7 (0.9 to 2.6)    | 0.3 (0.1 to 0.7)    |
|                      | 2005              | 0.7 (0.5 to 1.0)                           | 1.3 (0.9 to 1.8)    | 0.1 (0.0 to 0.3)    | 0.8 (0.5 to 1.2)                         | 1.5 (0.9 to 2.3)    | 0.2 (0.0 to 0.4)    |
|                      | 2006              | 0.7 (0.5 to 1.0)                           | 1.1 (0.8 to 1.6)    | 0.2 (0.1 to 0.5)    | 0.8 (0.5 to 1.2)                         | 1.3 (0.8 to 2.1)    | 0.3 (0.1 to 0.6)    |
|                      | 2007              | 0.9 (0.7 to 1.2)                           | 1.6 (1.1 to 2.2)    | 0.2 (0.1 to 0.5)    | 1.0 (0.7 to 1.5)                         | 1.7 (1.1 to 2.7)    | 0.3 (0.1 to 0.5)    |
|                      | 2008              | 0.7 (0.5 to 1.0)                           | 1.2 (0.8 to 1.7)    | 0.2 (0.1 to 0.4)    | 0.8 (0.5 to 1.2)                         | 1.4 (0.8 to 2.1)    | 0.2 (0.1 to 0.5)    |
|                      | 2009              | 1.0 (0.8 to 1.3)                           | 1.8 (1.3 to 2.4)    | 0.2 (0.1 to 0.4)    | 1.1 (0.8 to 1.6)                         | 2.0 (1.3 to 2.9)    | 0.3 (0.1 to 0.6)    |
|                      | 2010              | 0.9 (0.7 to 1.2)                           | 1.7 (1.2 to 2.3)    | 0.1 (0.0 to 0.3)    | 1.0 (0.7 to 1.5)                         | 1.9 (1.2 to 2.8)    | 0.2 (0.0 to 0.4)    |
|                      | 2011              | 0.6 (0.4 to 0.9)                           | 1.1 (0.8 to 1.6)    | 0.1 (0.0 to 0.3)    | 0.7 (0.4 to 1.1)                         | 1.3 (0.8 to 2.0)    | 0.1 (0.0 to 0.3)    |
|                      | 2012              | 0.6 (0.4 to 0.9)                           | 1.0 (0.7 to 1.4)    | 0.2 (0.1 to 0.4)    | 0.7 (0.4 to 1.0)                         | 1.1 (0.6 to 1.7)    | 0.3 (0.1 to 0.5)    |
|                      | 2013              | 0.7 (0.5 to 0.9)                           | 1.1 (0.8 to 1.5)    | 0.1 (0.0 to 0.3)    | 0.7 (0.5 to 1.1)                         | 1.3 (0.8 to 1.9)    | 0.2 (0.0 to 0.3)    |
|                      | 2014              | 0.6 (0.4 to 0.8)                           | 1.1 (0.8 to 1.6)    | 0.0 (0.0 to 0.1)    | 0.7 (0.4 to 1.1)                         | 1.3 (0.7 to 2.0)    | 0.0 (0.0 to 0.1)    |

| Histological type                     | Year at diagnosis | Completed ASIRs (per 100,000 person-years) |                     |                  | Imputed ASIRs (per 100,000 person-years) |                     |                  |
|---------------------------------------|-------------------|--------------------------------------------|---------------------|------------------|------------------------------------------|---------------------|------------------|
|                                       |                   | Overall                                    | Male                | Female           | Overall                                  | Male                | Female           |
|                                       |                   | 2015                                       | 0.7 (0.5 to 0.9)    | 1.0 (0.7 to 1.4) | 0.3 (0.2 to 0.6)                         | 0.8 (0.5 to 1.1)    | 1.1 (0.6 to 1.8) |
| Other non-small cell carcinoma        | 1993              | 0.2 (0.1 to 0.4)                           | 0.2 (0.1 to 0.5)    | 0.2 (0.0 to 0.4) | 0.2 (0.1 to 0.5)                         | 0.3 (0.1 to 0.7)    | 0.2 (0.0 to 0.5) |
|                                       | 1994              | 0.5 (0.3 to 0.7)                           | 0.9 (0.5 to 1.3)    | 0.2 (0.0 to 0.4) | 0.5 (0.3 to 0.9)                         | 0.9 (0.5 to 1.6)    | 0.2 (0.0 to 0.4) |
|                                       | 1995              | 0.6 (0.4 to 0.9)                           | 0.9 (0.6 to 1.4)    | 0.3 (0.1 to 0.6) | 0.6 (0.4 to 1.0)                         | 1.0 (0.6 to 1.5)    | 0.3 (0.1 to 0.7) |
|                                       | 1996              | 0.5 (0.3 to 0.8)                           | 0.8 (0.4 to 1.2)    | 0.3 (0.1 to 0.5) | 0.5 (0.3 to 0.8)                         | 0.8 (0.4 to 1.3)    | 0.3 (0.1 to 0.6) |
|                                       | 1997              | 0.5 (0.3 to 0.7)                           | 0.8 (0.5 to 1.3)    | 0.2 (0.1 to 0.5) | 0.5 (0.3 to 0.9)                         | 0.9 (0.4 to 1.4)    | 0.2 (0.1 to 0.5) |
|                                       | 1998              | 0.4 (0.2 to 0.6)                           | 0.5 (0.3 to 0.9)    | 0.3 (0.1 to 0.5) | 0.4 (0.2 to 0.7)                         | 0.6 (0.2 to 1.1)    | 0.3 (0.1 to 0.6) |
|                                       | 1999              | 0.4 (0.2 to 0.6)                           | 0.7 (0.4 to 1.1)    | 0.1 (0.0 to 0.3) | 0.4 (0.2 to 0.8)                         | 0.7 (0.4 to 1.2)    | 0.2 (0.0 to 0.4) |
|                                       | 2000              | 0.4 (0.3 to 0.6)                           | 0.4 (0.2 to 0.8)    | 0.4 (0.2 to 0.7) | 0.5 (0.2 to 0.9)                         | 0.5 (0.2 to 1.1)    | 0.4 (0.2 to 0.8) |
|                                       | 2001              | 0.3 (0.2 to 0.5)                           | 0.4 (0.2 to 0.8)    | 0.2 (0.1 to 0.5) | 0.4 (0.1 to 0.7)                         | 0.5 (0.2 to 1.0)    | 0.3 (0.1 to 0.7) |
|                                       | 2002              | 0.3 (0.2 to 0.5)                           | 0.6 (0.3 to 0.9)    | 0.1 (0.0 to 0.3) | 0.4 (0.2 to 0.7)                         | 0.7 (0.3 to 1.2)    | 0.1 (0.0 to 0.3) |
|                                       | 2003              | 0.4 (0.3 to 0.7)                           | 0.7 (0.4 to 1.0)    | 0.2 (0.1 to 0.5) | 0.5 (0.2 to 0.8)                         | 0.7 (0.3 to 1.3)    | 0.3 (0.1 to 0.6) |
|                                       | 2004              | 0.5 (0.3 to 0.7)                           | 0.7 (0.4 to 1.0)    | 0.3 (0.1 to 0.5) | 0.5 (0.3 to 0.8)                         | 0.8 (0.4 to 1.3)    | 0.3 (0.1 to 0.6) |
|                                       | 2005              | 0.8 (0.6 to 1.1)                           | 1.2 (0.8 to 1.7)    | 0.5 (0.2 to 0.8) | 0.9 (0.6 to 1.3)                         | 1.3 (0.7 to 1.9)    | 0.5 (0.2 to 0.9) |
|                                       | 2006              | 0.6 (0.4 to 0.8)                           | 0.9 (0.6 to 1.4)    | 0.2 (0.0 to 0.4) | 0.6 (0.4 to 1.0)                         | 1.1 (0.6 to 1.6)    | 0.2 (0.0 to 0.5) |
|                                       | 2007              | 0.7 (0.5 to 0.9)                           | 1.2 (0.8 to 1.7)    | 0.1 (0.0 to 0.3) | 0.7 (0.5 to 1.1)                         | 1.3 (0.8 to 1.9)    | 0.2 (0.0 to 0.4) |
|                                       | 2008              | 0.8 (0.5 to 1.1)                           | 1.2 (0.8 to 1.7)    | 0.3 (0.2 to 0.6) | 0.8 (0.5 to 1.3)                         | 1.3 (0.7 to 2.1)    | 0.4 (0.2 to 0.7) |
|                                       | 2009              | 0.8 (0.5 to 1.0)                           | 1.3 (0.9 to 1.8)    | 0.2 (0.1 to 0.4) | 0.8 (0.5 to 1.2)                         | 1.4 (0.8 to 2.1)    | 0.2 (0.1 to 0.6) |
|                                       | 2010              | 0.9 (0.6 to 1.2)                           | 1.3 (0.9 to 1.8)    | 0.5 (0.2 to 0.9) | 1.0 (0.7 to 1.4)                         | 1.5 (0.9 to 2.2)    | 0.5 (0.2 to 0.9) |
|                                       | 2011              | 0.8 (0.6 to 1.1)                           | 1.1 (0.8 to 1.6)    | 0.4 (0.2 to 0.7) | 0.9 (0.6 to 1.3)                         | 1.3 (0.8 to 2.1)    | 0.4 (0.2 to 0.8) |
|                                       | 2012              | 1.1 (0.8 to 1.4)                           | 1.7 (1.2 to 2.3)    | 0.4 (0.2 to 0.7) | 1.2 (0.8 to 1.6)                         | 1.8 (1.2 to 2.5)    | 0.5 (0.2 to 0.9) |
| 2013                                  | 1.1 (0.9 to 1.5)  | 1.5 (1.1 to 2.1)                           | 0.7 (0.4 to 1.1)    | 1.2 (0.9 to 1.7) | 1.7 (1.1 to 2.5)                         | 0.8 (0.4 to 1.2)    |                  |
| 2014                                  | 1.6 (1.2 to 2.0)  | 2.5 (1.9 to 3.2)                           | 0.6 (0.3 to 1.0)    | 1.7 (1.2 to 2.2) | 2.7 (1.9 to 3.6)                         | 0.6 (0.3 to 1.0)    |                  |
| 2015                                  | 1.3 (1.0 to 1.7)  | 2.0 (1.5 to 2.7)                           | 0.5 (0.3 to 0.8)    | 1.4 (1.0 to 1.8) | 2.2 (1.5 to 2.9)                         | 0.5 (0.3 to 0.9)    |                  |
| Other specified and unspecified types | 1993              | 7.5 (6.7 to 8.3)                           | 11.6 (10.2 to 13.1) | 3.8 (3.0 to 4.6) | 7.5 (6.7 to 8.3)                         | 11.6 (10.2 to 13.1) | 3.8 (3.0 to 4.6) |
|                                       | 1994              | 6.8 (6.1 to 7.5)                           | 10.3 (9.0 to 11.7)  | 3.6 (2.9 to 4.4) | 6.8 (6.1 to 7.5)                         | 10.3 (9.0 to 11.7)  | 3.6 (2.9 to 4.4) |
|                                       | 1995              | 6.7 (6.0 to 7.5)                           | 10.1 (8.9 to 11.4)  | 3.7 (3.0 to 4.5) | 6.7 (6.0 to 7.5)                         | 10.1 (8.9 to 11.4)  | 3.7 (3.0 to 4.5) |
|                                       | 1996              | 7.1 (6.4 to 7.9)                           | 10.6 (9.3 to 11.9)  | 4.0 (3.3 to 4.8) | 7.1 (6.4 to 7.9)                         | 10.6 (9.3 to 11.9)  | 4.0 (3.3 to 4.8) |
|                                       | 1997              | 6.2 (5.5 to 6.8)                           | 9.4 (8.2 to 10.6)   | 3.3 (2.7 to 4.0) | 6.2 (5.5 to 6.8)                         | 9.4 (8.2 to 10.6)   | 3.3 (2.7 to 4.0) |
|                                       | 1998              | 5.5 (4.9 to 6.1)                           | 8.3 (7.2 to 9.4)    | 2.9 (2.3 to 3.6) | 5.5 (4.9 to 6.1)                         | 8.3 (7.2 to 9.4)    | 2.9 (2.3 to 3.6) |
|                                       | 1999              | 6.2 (5.6 to 6.9)                           | 8.8 (7.7 to 10.0)   | 3.9 (3.2 to 4.6) | 6.2 (5.6 to 6.9)                         | 8.8 (7.7 to 10.0)   | 3.9 (3.2 to 4.6) |
|                                       | 2000              | 6.5 (5.9 to 7.2)                           | 9.3 (8.2 to 10.6)   | 4.0 (3.3 to 4.7) | 6.5 (5.9 to 7.2)                         | 9.3 (8.2 to 10.6)   | 4.0 (3.3 to 4.7) |
|                                       | 2001              | 6.1 (5.5 to 6.8)                           | 8.9 (7.9 to 10.1)   | 3.6 (3.0 to 4.3) | 6.1 (5.5 to 6.8)                         | 8.9 (7.9 to 10.1)   | 3.6 (3.0 to 4.3) |
|                                       | 2002              | 6.9 (6.2 to 7.6)                           | 10.5 (9.4 to 11.7)  | 3.5 (2.9 to 4.2) | 6.9 (6.2 to 7.6)                         | 10.5 (9.4 to 11.7)  | 3.5 (2.9 to 4.2) |
|                                       | 2003              | 6.3 (5.7 to 6.9)                           | 9.8 (8.7 to 11.0)   | 3.0 (2.5 to 3.7) | 6.3 (5.7 to 6.9)                         | 9.8 (8.7 to 11.0)   | 3.0 (2.5 to 3.7) |
|                                       | 2004              | 6.7 (6.1 to 7.4)                           | 10.5 (9.4 to 11.7)  | 3.1 (2.6 to 3.8) | 6.7 (6.1 to 7.4)                         | 10.5 (9.4 to 11.7)  | 3.1 (2.6 to 3.8) |
|                                       | 2005              | 6.1 (5.5 to 6.7)                           | 9.5 (8.5 to 10.6)   | 3.0 (2.5 to 3.6) | 6.1 (5.5 to 6.7)                         | 9.5 (8.5 to 10.6)   | 3.0 (2.5 to 3.6) |
|                                       | 2006              | 6.3 (5.7 to 6.9)                           | 9.3 (8.3 to 10.4)   | 3.5 (2.9 to 4.1) | 6.3 (5.7 to 6.9)                         | 9.3 (8.3 to 10.4)   | 3.5 (2.9 to 4.1) |
|                                       | 2007              | 5.4 (4.8 to 5.9)                           | 8.4 (7.5 to 9.5)    | 2.4 (2.0 to 2.9) | 5.4 (4.8 to 5.9)                         | 8.4 (7.5 to 9.5)    | 2.4 (2.0 to 2.9) |
|                                       | 2008              | 6.1 (5.5 to 6.7)                           | 9.4 (8.4 to 10.5)   | 2.9 (2.4 to 3.4) | 6.1 (5.5 to 6.7)                         | 9.4 (8.4 to 10.5)   | 2.9 (2.4 to 3.4) |
|                                       | 2009              | 5.0 (4.6 to 5.6)                           | 7.4 (6.6 to 8.3)    | 2.8 (2.4 to 3.4) | 5.0 (4.6 to 5.6)                         | 7.4 (6.6 to 8.3)    | 2.8 (2.4 to 3.4) |
|                                       | 2010              | 5.2 (4.7 to 5.8)                           | 7.6 (6.7 to 8.5)    | 3.0 (2.5 to 3.6) | 5.2 (4.7 to 5.8)                         | 7.6 (6.7 to 8.5)    | 3.0 (2.5 to 3.6) |
|                                       | 2011              | 5.1 (4.6 to 5.6)                           | 7.4 (6.5 to 8.3)    | 2.8 (2.3 to 3.4) | 5.1 (4.6 to 5.6)                         | 7.4 (6.5 to 8.3)    | 2.8 (2.3 to 3.4) |
|                                       | 2012              | 4.8 (4.3 to 5.3)                           | 7.0 (6.2 to 8.0)    | 2.5 (2.0 to 3.0) | 4.8 (4.3 to 5.3)                         | 7.0 (6.2 to 8.0)    | 2.5 (2.0 to 3.0) |
| 2013                                  | 4.8 (4.3 to 5.4)  | 7.2 (6.3 to 8.1)                           | 2.5 (2.0 to 3.0)    | 4.8 (4.3 to 5.4) | 7.2 (6.3 to 8.1)                         | 2.5 (2.0 to 3.0)    |                  |
| 2014                                  | 5.0 (4.5 to 5.6)  | 7.2 (6.4 to 8.0)                           | 2.9 (2.4 to 3.5)    | 5.0 (4.5 to 5.6) | 7.2 (6.4 to 8.0)                         | 2.9 (2.4 to 3.5)    |                  |

| Histological type | Year at diagnosis | Completed ASIRs (per 100,000 person-years) |                  |                  | Imputed ASIRs (per 100,000 person-years) |                  |                  |
|-------------------|-------------------|--------------------------------------------|------------------|------------------|------------------------------------------|------------------|------------------|
|                   |                   | Overall                                    | Male             | Female           | Overall                                  | Male             | Female           |
|                   | 2015              | 4.4 (4.0 to 4.9)                           | 6.2 (5.4 to 7.0) | 2.6 (2.1 to 3.1) | 4.4 (4.0 to 4.9)                         | 6.2 (5.4 to 7.0) | 2.6 (2.1 to 3.1) |

Notes: ASIRs=Age-standardized incidence rates expressed per 100,000 person-years using the "Standard Japanese Population in 1985"; 95% CIs=95% Confidence intervals; Three Japanese cancer registries are in Yamagata, Fukui and Nagasaki prefectures.

Table S6: Completed and imputed ASIRs of lung cancer in three cancer registries in Japan, 1993–2015, by stage at diagnosis

| Stage at diagnosis | Year at diagnosis   | Completed ASIRs (per 100,000 person-years) |                     |                     | Imputed ASIRs (per 100,000 person-years) |                     |                     |
|--------------------|---------------------|--------------------------------------------|---------------------|---------------------|------------------------------------------|---------------------|---------------------|
|                    |                     | Overall                                    | Male                | Female              | Overall                                  | Male                | Female              |
| Localized          | 1993                | 7.3 (6.5 to 8.2)                           | 10.3 (9.0 to 11.7)  | 4.6 (3.7 to 5.6)    | 8.8 (7.4 to 10.2)                        | 12.4 (10.1 to 14.8) | 5.4 (4.3 to 6.8)    |
|                    | 1994                | 7.3 (6.5 to 8.1)                           | 10.3 (9.0 to 11.7)  | 4.5 (3.7 to 5.5)    | 8.6 (7.5 to 9.8)                         | 12.1 (10.2 to 14.2) | 5.3 (4.1 to 6.7)    |
|                    | 1995                | 6.8 (6.0 to 7.6)                           | 8.9 (7.7 to 10.2)   | 4.7 (3.9 to 5.7)    | 8.3 (6.9 to 9.8)                         | 11.1 (8.6 to 13.9)  | 5.7 (4.4 to 7.2)    |
|                    | 1996                | 8.0 (7.2 to 8.8)                           | 10.6 (9.3 to 12.1)  | 5.5 (4.6 to 6.5)    | 9.3 (8.2 to 10.6)                        | 12.6 (10.8 to 14.7) | 6.2 (4.9 to 7.7)    |
|                    | 1997                | 8.8 (7.9 to 9.7)                           | 11.8 (10.4 to 13.3) | 5.8 (4.9 to 6.9)    | 10.4 (9.2 to 11.6)                       | 14.2 (12.1 to 16.5) | 6.7 (5.4 to 8.2)    |
|                    | 1998                | 8.6 (7.8 to 9.5)                           | 11.2 (9.9 to 12.6)  | 6.1 (5.1 to 7.2)    | 10.0 (8.9 to 11.3)                       | 13.3 (11.4 to 15.3) | 7.0 (5.7 to 8.5)    |
|                    | 1999                | 9.5 (8.7 to 10.5)                          | 11.9 (10.5 to 13.3) | 7.4 (6.3 to 8.6)    | 11.2 (9.9 to 12.5)                       | 14.0 (12.0 to 16.2) | 8.6 (7.2 to 10.1)   |
|                    | 2000                | 9.5 (8.6 to 10.4)                          | 11.7 (10.4 to 13.1) | 7.4 (6.3 to 8.6)    | 11.1 (9.9 to 12.3)                       | 14.0 (12.2 to 15.9) | 8.3 (6.9 to 9.8)    |
|                    | 2001                | 8.7 (7.9 to 9.6)                           | 11.1 (9.8 to 12.4)  | 6.5 (5.5 to 7.5)    | 10.5 (9.2 to 11.8)                       | 13.6 (11.3 to 16.1) | 7.4 (6.1 to 9.0)    |
|                    | 2002                | 9.4 (8.6 to 10.3)                          | 11.8 (10.5 to 13.2) | 7.1 (6.0 to 8.2)    | 11.4 (10.2 to 12.8)                      | 14.7 (12.8 to 16.8) | 8.3 (6.8 to 9.9)    |
|                    | 2003                | 9.9 (9.1 to 10.8)                          | 11.6 (10.3 to 12.9) | 8.3 (7.2 to 9.5)    | 11.9 (10.7 to 13.2)                      | 14.2 (12.4 to 16.3) | 9.6 (8.1 to 11.3)   |
|                    | 2004                | 10.7 (9.8 to 11.6)                         | 12.6 (11.3 to 14.1) | 8.7 (7.5 to 9.9)    | 12.3 (11.0 to 13.6)                      | 15.0 (12.9 to 17.2) | 9.6 (8.3 to 11.0)   |
|                    | 2005                | 10.2 (9.4 to 11.1)                         | 12.3 (11.0 to 13.6) | 8.2 (7.1 to 9.4)    | 11.6 (10.3 to 13.0)                      | 14.1 (12.1 to 16.4) | 9.1 (7.8 to 10.4)   |
|                    | 2006                | 11.9 (10.9 to 12.8)                        | 13.7 (12.4 to 15.2) | 9.9 (8.7 to 11.2)   | 13.1 (11.9 to 14.3)                      | 15.5 (13.7 to 17.4) | 10.6 (9.2 to 12.2)  |
|                    | 2007                | 12.4 (11.4 to 13.4)                        | 15.7 (14.2 to 17.2) | 8.9 (7.8 to 10.2)   | 13.4 (12.2 to 14.7)                      | 17.2 (15.3 to 19.2) | 9.5 (8.2 to 11.0)   |
|                    | 2008                | 13.7 (12.7 to 14.7)                        | 15.7 (14.3 to 17.3) | 11.4 (10.1 to 12.9) | 14.7 (13.6 to 16.0)                      | 17.3 (15.5 to 19.2) | 12.1 (10.6 to 13.7) |
|                    | 2009                | 14.5 (13.5 to 15.6)                        | 16.3 (14.8 to 17.9) | 12.5 (11.2 to 13.9) | 15.2 (14.0 to 16.5)                      | 17.3 (15.4 to 19.4) | 13.0 (11.4 to 14.6) |
|                    | 2010                | 15.9 (14.8 to 17.0)                        | 18.0 (16.5 to 19.7) | 13.6 (12.2 to 15.1) | 16.6 (15.4 to 17.9)                      | 19.0 (17.2 to 21.0) | 14.0 (12.4 to 15.8) |
|                    | 2011                | 15.6 (14.5 to 16.6)                        | 18.5 (16.9 to 20.1) | 12.4 (11.0 to 13.8) | 16.3 (15.0 to 17.7)                      | 19.4 (17.6 to 21.4) | 13.0 (11.4 to 14.7) |
|                    | 2012                | 16.9 (15.8 to 18.1)                        | 18.7 (17.2 to 20.4) | 14.7 (13.2 to 16.3) | 17.5 (16.3 to 18.8)                      | 19.5 (17.8 to 21.4) | 15.1 (13.5 to 16.8) |
| 2013               | 17.7 (16.6 to 18.8) | 20.0 (18.4 to 21.7)                        | 15.1 (13.6 to 16.7) | 18.3 (17.1 to 19.6) | 20.9 (19.1 to 22.8)                      | 15.4 (13.8 to 17.0) |                     |
| 2014               | 18.3 (17.2 to 19.5) | 20.3 (18.7 to 22.1)                        | 15.9 (14.3 to 17.5) | 18.8 (17.6 to 20.1) | 21.1 (19.3 to 23.0)                      | 16.1 (14.6 to 17.8) |                     |
| 2015               | 16.5 (15.4 to 17.6) | 18.4 (16.9 to 20.1)                        | 14.2 (12.7 to 15.8) | 17.1 (15.9 to 18.3) | 19.2 (17.5 to 21.1)                      | 14.5 (13.0 to 16.2) |                     |
| Regional           | 1993                | 10.6 (9.7 to 11.6)                         | 17.1 (15.4 to 18.9) | 4.6 (3.8 to 5.6)    | 14.7 (12.5 to 17.0)                      | 23.5 (19.9 to 27.4) | 6.5 (4.5 to 8.8)    |
|                    | 1994                | 10.6 (9.7 to 11.6)                         | 17.1 (15.4 to 18.9) | 4.6 (3.8 to 5.6)    | 14.3 (12.8 to 15.8)                      | 23.1 (20.2 to 26.2) | 6.1 (4.6 to 7.9)    |
|                    | 1995                | 11.0 (10.0 to 12.0)                        | 17.5 (15.8 to 19.4) | 4.9 (4.0 to 5.9)    | 14.9 (12.9 to 17.1)                      | 23.9 (20.1 to 28.0) | 6.7 (5.3 to 8.3)    |
|                    | 1996                | 11.4 (10.4 to 12.4)                        | 18.1 (16.3 to 19.9) | 5.0 (4.2 to 6.0)    | 15.1 (13.4 to 17.0)                      | 24.0 (20.8 to 27.5) | 6.8 (5.5 to 8.3)    |
|                    | 1997                | 11.3 (10.4 to 12.3)                        | 17.6 (15.9 to 19.4) | 5.3 (4.4 to 6.3)    | 15.4 (13.9 to 17.1)                      | 24.1 (21.1 to 27.3) | 7.2 (5.8 to 8.9)    |
|                    | 1998                | 11.2 (10.3 to 12.2)                        | 17.5 (15.8 to 19.2) | 5.2 (4.3 to 6.2)    | 15.2 (13.5 to 17.1)                      | 24.0 (20.7 to 27.6) | 7.0 (5.6 to 8.5)    |
|                    | 1999                | 11.4 (10.4 to 12.4)                        | 18.1 (16.5 to 19.9) | 4.9 (4.1 to 5.9)    | 15.4 (13.6 to 17.4)                      | 24.7 (21.6 to 28.2) | 6.6 (5.1 to 8.4)    |
|                    | 2000                | 9.7 (8.8 to 10.6)                          | 15.8 (14.2 to 17.4) | 3.7 (3.0 to 4.5)    | 13.3 (11.6 to 15.2)                      | 21.7 (18.3 to 25.3) | 5.3 (3.8 to 7.1)    |
|                    | 2001                | 10.5 (9.6 to 11.4)                         | 15.9 (14.4 to 17.6) | 5.1 (4.2 to 6.1)    | 14.4 (12.5 to 16.4)                      | 22.3 (19.1 to 25.7) | 6.8 (5.1 to 8.8)    |
|                    | 2002                | 11.3 (10.4 to 12.3)                        | 16.9 (15.3 to 18.5) | 5.9 (4.9 to 6.9)    | 15.6 (13.8 to 17.5)                      | 23.9 (20.9 to 27.2) | 7.5 (5.8 to 9.5)    |
|                    | 2003                | 11.7 (10.8 to 12.6)                        | 18.1 (16.5 to 19.8) | 5.4 (4.5 to 6.3)    | 15.5 (14.0 to 17.2)                      | 24.2 (21.3 to 27.3) | 7.1 (5.7 to 8.7)    |
|                    | 2004                | 11.6 (10.7 to 12.6)                        | 16.9 (15.4 to 18.5) | 6.4 (5.5 to 7.4)    | 15.2 (13.7 to 16.8)                      | 22.7 (20.2 to 25.3) | 7.9 (6.5 to 9.4)    |
|                    | 2005                | 12.2 (11.3 to 13.1)                        | 18.6 (17.0 to 20.3) | 5.8 (4.9 to 6.7)    | 15.1 (13.8 to 16.5)                      | 23.1 (20.6 to 25.8) | 7.2 (5.8 to 8.7)    |
|                    | 2006                | 11.9 (11.0 to 12.9)                        | 18.0 (16.4 to 19.6) | 5.8 (4.9 to 6.8)    | 14.6 (13.2 to 16.0)                      | 22.0 (19.8 to 24.5) | 7.1 (5.7 to 8.7)    |
|                    | 2007                | 12.0 (11.1 to 13.0)                        | 19.0 (17.3 to 20.7) | 4.8 (4.0 to 5.7)    | 14.1 (12.8 to 15.4)                      | 22.2 (20.1 to 24.5) | 5.7 (4.5 to 7.1)    |
|                    | 2008                | 12.3 (11.4 to 13.3)                        | 18.6 (17.1 to 20.3) | 5.7 (4.9 to 6.7)    | 14.4 (13.2 to 15.7)                      | 21.9 (19.8 to 24.2) | 6.6 (5.3 to 8.1)    |
|                    | 2009                | 12.5 (11.6 to 13.5)                        | 19.0 (17.5 to 20.7) | 5.6 (4.7 to 6.5)    | 14.0 (12.9 to 15.3)                      | 21.4 (19.3 to 23.7) | 6.3 (5.2 to 7.6)    |
|                    | 2010                | 12.7 (11.8 to 13.7)                        | 19.4 (17.8 to 21.1) | 5.7 (4.8 to 6.7)    | 13.9 (12.7 to 15.1)                      | 21.0 (19.0 to 23.2) | 6.4 (5.2 to 7.7)    |
|                    | 2011                | 12.0 (11.1 to 13.0)                        | 17.4 (15.9 to 19.0) | 6.2 (5.3 to 7.3)    | 13.3 (12.0 to 14.8)                      | 19.4 (16.9 to 22.0) | 6.9 (5.7 to 8.1)    |
|                    | 2012                | 11.0 (10.1 to 12.0)                        | 16.9 (15.4 to 18.5) | 4.8 (4.0 to 5.7)    | 12.1 (11.0 to 13.4)                      | 18.6 (16.6 to 20.7) | 5.3 (4.2 to 6.5)    |
| 2013               | 10.3 (9.4 to 11.2)  | 14.9 (13.5 to 16.4)                        | 5.2 (4.4 to 6.2)    | 11.2 (10.0 to 12.4) | 16.3 (14.3 to 18.5)                      | 5.6 (4.7 to 6.7)    |                     |
| 2014               | 10.2 (9.3 to 11.1)  | 15.4 (14.0 to 17.0)                        | 4.4 (3.6 to 5.2)    | 11.0 (9.8 to 12.2)  | 16.6 (14.7 to 18.6)                      | 4.7 (3.8 to 5.9)    |                     |

| Stage at diagnosis | Year at diagnosis   | Completed ASIRs (per 100,000 person-years) |                     |                     | Imputed ASIRs (per 100,000 person-years) |                     |                     |
|--------------------|---------------------|--------------------------------------------|---------------------|---------------------|------------------------------------------|---------------------|---------------------|
|                    |                     | Overall                                    | Male                | Female              | Overall                                  | Male                | Female              |
| Distant            | 2015                | 9.4 (8.6 to 10.3)                          | 14.6 (13.2 to 16.1) | 3.7 (3.0 to 4.5)    | 10.2 (9.2 to 11.3)                       | 15.8 (14.1 to 17.6) | 4.1 (3.2 to 5.0)    |
|                    | 1993                | 11.2 (10.3 to 12.3)                        | 17.4 (15.6 to 19.2) | 5.5 (4.6 to 6.5)    | 17.9 (15.6 to 20.3)                      | 26.9 (23.0 to 31.2) | 9.5 (7.8 to 11.5)   |
|                    | 1994                | 11.1 (10.2 to 12.2)                        | 16.3 (14.6 to 18.0) | 6.4 (5.4 to 7.5)    | 17.7 (16.2 to 19.3)                      | 25.8 (22.9 to 28.9) | 10.2 (8.4 to 12.2)  |
|                    | 1995                | 11.9 (10.9 to 12.9)                        | 17.9 (16.2 to 19.7) | 6.3 (5.3 to 7.4)    | 18.8 (17.0 to 20.7)                      | 28.0 (24.8 to 31.5) | 10.2 (8.6 to 12.0)  |
|                    | 1996                | 11.8 (10.8 to 12.8)                        | 17.1 (15.5 to 18.9) | 6.7 (5.7 to 7.9)    | 18.4 (16.6 to 20.3)                      | 26.6 (23.5 to 29.8) | 10.8 (9.2 to 12.6)  |
|                    | 1997                | 11.9 (10.9 to 12.9)                        | 18.1 (16.4 to 19.9) | 5.9 (4.9 to 6.9)    | 19.5 (17.7 to 21.5)                      | 29.8 (26.3 to 33.4) | 9.9 (8.4 to 11.5)   |
|                    | 1998                | 10.8 (9.8 to 11.7)                         | 16.7 (15.1 to 18.5) | 5.0 (4.2 to 6.0)    | 17.7 (15.9 to 19.6)                      | 26.8 (23.5 to 30.3) | 9.2 (7.5 to 11.0)   |
|                    | 1999                | 11.4 (10.5 to 12.4)                        | 17.8 (16.1 to 19.5) | 5.4 (4.5 to 6.4)    | 18.3 (16.4 to 20.3)                      | 28.1 (24.7 to 31.8) | 9.1 (7.5 to 10.9)   |
|                    | 2000                | 11.3 (10.4 to 12.3)                        | 16.6 (15.0 to 18.3) | 6.2 (5.2 to 7.2)    | 18.6 (16.7 to 20.6)                      | 27.5 (24.1 to 31.2) | 10.1 (8.0 to 12.3)  |
|                    | 2001                | 12.1 (11.1 to 13.1)                        | 17.7 (16.1 to 19.4) | 6.6 (5.6 to 7.6)    | 19.2 (17.4 to 21.2)                      | 28.3 (25.1 to 31.7) | 10.5 (8.8 to 12.4)  |
|                    | 2002                | 10.5 (9.6 to 11.4)                         | 14.6 (13.2 to 16.2) | 6.4 (5.4 to 7.4)    | 17.8 (16.0 to 19.6)                      | 25.9 (22.9 to 29.0) | 9.9 (8.4 to 11.6)   |
|                    | 2003                | 12.2 (11.2 to 13.1)                        | 17.9 (16.3 to 19.6) | 6.4 (5.5 to 7.4)    | 19.2 (17.5 to 20.9)                      | 28.6 (25.8 to 31.6) | 10.0 (8.2 to 12.0)  |
|                    | 2004                | 13.3 (12.3 to 14.3)                        | 19.7 (18.1 to 21.5) | 6.9 (5.9 to 8.0)    | 19.9 (18.2 to 21.7)                      | 29.6 (26.9 to 32.6) | 10.4 (8.8 to 12.2)  |
|                    | 2005                | 12.4 (11.5 to 13.4)                        | 20.1 (18.4 to 21.8) | 4.8 (4.0 to 5.7)    | 18.2 (16.6 to 19.8)                      | 27.9 (25.2 to 30.8) | 8.6 (7.1 to 10.3)   |
|                    | 2006                | 13.6 (12.6 to 14.6)                        | 20.0 (18.4 to 21.8) | 7.0 (6.0 to 8.0)    | 19.3 (17.8 to 20.9)                      | 28.1 (25.6 to 30.8) | 10.4 (8.8 to 12.2)  |
|                    | 2007                | 14.0 (13.0 to 15.0)                        | 20.7 (19.0 to 22.5) | 7.1 (6.1 to 8.1)    | 18.4 (16.9 to 20.0)                      | 27.3 (24.9 to 29.9) | 9.3 (8.0 to 10.9)   |
|                    | 2008                | 15.5 (14.4 to 16.6)                        | 23.2 (21.4 to 25.1) | 7.5 (6.5 to 8.6)    | 20.1 (18.7 to 21.7)                      | 30.0 (27.6 to 32.5) | 10.0 (8.6 to 11.6)  |
|                    | 2009                | 16.7 (15.7 to 17.9)                        | 23.9 (22.1 to 25.8) | 9.3 (8.1 to 10.5)   | 20.3 (18.8 to 21.9)                      | 28.8 (26.2 to 31.5) | 11.5 (10.0 to 13.1) |
|                    | 2010                | 17.1 (16.0 to 18.2)                        | 24.9 (23.1 to 26.9) | 8.8 (7.7 to 10.0)   | 20.4 (19.0 to 21.8)                      | 29.5 (27.2 to 31.8) | 10.8 (9.5 to 12.2)  |
|                    | 2011                | 17.0 (15.9 to 18.1)                        | 23.9 (22.1 to 25.8) | 9.5 (8.4 to 10.8)   | 20.5 (18.9 to 22.1)                      | 28.7 (25.8 to 31.7) | 11.7 (10.2 to 13.3) |
| 2012               | 18.1 (16.9 to 19.3) | 25.1 (23.2 to 27.1)                        | 10.5 (9.3 to 11.8)  | 21.2 (19.8 to 22.7) | 29.3 (27.1 to 31.7)                      | 12.5 (11.0 to 14.2) |                     |
| 2013               | 17.1 (16.0 to 18.2) | 24.9 (23.1 to 26.8)                        | 8.7 (7.7 to 9.9)    | 19.7 (18.3 to 21.1) | 28.5 (26.2 to 30.9)                      | 10.2 (8.9 to 11.5)  |                     |
| 2014               | 17.3 (16.2 to 18.5) | 24.6 (22.8 to 26.5)                        | 9.4 (8.3 to 10.6)   | 19.8 (18.5 to 21.2) | 28.2 (25.9 to 30.5)                      | 10.8 (9.4 to 12.3)  |                     |
| 2015               | 16.9 (15.9 to 18.1) | 23.4 (21.6 to 25.2)                        | 9.8 (8.6 to 11.1)   | 19.3 (18.0 to 20.7) | 26.8 (24.7 to 29.2)                      | 11.0 (9.7 to 12.5)  |                     |

Notes: ASIRs=Age-standardized incidence rates expressed per 100,000 person-years using the "Standard Japanese Population in 1985"; 95% CIs=95% Confidence intervals  
Three Japanese cancer registries are in Yamagata, Fukui and Nagasaki prefectures.

Table S7: Joinpoint regression analysis of trends in completed ASIRs (before imputation) of lung cancer in three cancer registries in Japan, 1993–2015, by histological type and stage at diagnosis separately.

| Categories              | AAPC (95% CI)          | Trends | Trend 1   |                        | Trend 2   |                        | Trend 3   |                    |
|-------------------------|------------------------|--------|-----------|------------------------|-----------|------------------------|-----------|--------------------|
|                         |                        |        | Period_1  | APC (95% CI)_1         | Period_2  | APC (95% CI)_2         | Period_3  | APC (95% CI)_3     |
| Male                    |                        |        |           |                        |           |                        |           |                    |
| Total                   | 0.0 (-0.4 to 0.4)      | 2      | 1993–2011 | 0.5 (0.3 to 0.7)***    | 2011–2015 | -2.1 (-4.2 to 0.0)     |           |                    |
| Small cell carcinoma    | -0.3 (-0.8 to 0.2)     | 1      | 1993–2015 | -0.3 (-0.8 to 0.2)     |           |                        |           |                    |
| Squamous cell carcinoma | -0.8 (-1.2 to -0.4)*** | 1      | 1993–2015 | -0.8 (-1.2 to -0.4)*** |           |                        |           |                    |
| Adenocarcinoma          | 1.9 (1.6 to 2.3)***    | 1      | 1993–2015 | 1.9 (1.6 to 2.3)***    |           |                        |           |                    |
| Localized               | 3.0 (1.8 to 4.2)***    | 3      | 1993–2004 | 1.9 (0.6 to 3.1)**     | 2004–2012 | 6.1 (4.1 to 8.1)***    | 2012–2015 | -0.8 (-6.9 to 5.6) |
| Regional                | -0.7 (-1.5 to 0.0)     | 2      | 1993–2010 | 0.6 (0.1 to 1.1)*      | 2010–2015 | -5.1 (-8.0 to -2.2)**  |           |                    |
| Distant                 | 1.5 (0.7 to 2.2)***    | 3      | 1993–2002 | -0.4 (-1.5 to 0.7)     | 2002–2010 | 5.1 (3.6 to 6.5)***    | 2010–2015 | -0.8 (-2.9 to 1.3) |
| Female                  |                        |        |           |                        |           |                        |           |                    |
| Total                   | 1.9 (1.5 to 2.2)***    | 1      | 1993–2015 | 1.9 (1.5 to 2.2)***    |           |                        |           |                    |
| Small cell carcinoma    | 0.8 (-0.2 to 1.9)      | 1      | 1993–2015 | 0.8 (-0.2 to 1.9)      |           |                        |           |                    |
| Squamous cell carcinoma | 0.5 (-0.6 to 1.7)      | 1      | 1993–2015 | 0.5 (-0.6 to 1.7)      |           |                        |           |                    |
| Adenocarcinoma          | 3.4 (2.9 to 3.8)***    | 1      | 1993–2015 | 3.4 (2.9 to 3.8)***    |           |                        |           |                    |
| Localized               | 6.0 (5.4 to 6.6)***    | 1      | 1993–2015 | 6.0 (5.4 to 6.6)***    |           |                        |           |                    |
| Regional                | -0.9 (-2.8 to 1.0)     | 2      | 1993–2011 | 1.3 (0.3 to 2.3)*      | 2011–2015 | -10.3 (-19.2 to -0.5)* |           |                    |
| Distant                 | 2.8 (1.5 to 4.0)***    | 2      | 1993–2005 | 0.9 (-0.8 to 2.7)      | 2005–2015 | 5.0 (3.0 to 7.1)***    |           |                    |

Notes: ASIRs=Age-standardized incidence rates; AAPC=Average annual percentage change; APC=Annual percentage change; CI=Confidence Interval; \*\*\*, \*\*, \* Statistically significant results with P<0.001, P<0.01, and P<0.05, respectively; Three Japanese cancer registries are in Yamagata, Fukui and Nagasaki prefectures.



Table S8: Joinpoint regression analysis of trends in completed ASIRs (before imputation) of lung cancer in three cancer registries in Japan, 1993–2015, by histology-stage-combination

|        | Histological type       | Stage at diagnosis | AAPC (95% CI)         | Trends | Trend 1   |                       | Trend 2   |                        | Trend 3   |                       |
|--------|-------------------------|--------------------|-----------------------|--------|-----------|-----------------------|-----------|------------------------|-----------|-----------------------|
|        |                         |                    |                       |        | Period    | APC (95% CI)          | Period    | APC (95% CI)           | Period    | APC (95% CI)          |
| Male   | Small cell carcinoma    | Localized          | 0.1 (-1.7 to 1.9)     | 1      | 1993–2015 | 0.1 (-1.7 to 1.9)     |           |                        |           |                       |
|        |                         | Regional           | -0.6 (-1.6 to 0.3)    | 1      | 1993–2015 | -0.6 (-1.6 to 0.3)    |           |                        |           |                       |
|        |                         | Distant            | 1.8 (0.9 to 2.6)***   | 1      | 1993–2015 | 1.8 (0.9 to 2.6)***   |           |                        |           |                       |
|        | Squamous cell carcinoma | Localized          | 0.2 (-1.5 to 1.9)     | 2      | 1993–2003 | -2.7 (-5.6 to 0.4)    | 2003–2015 | 2.7 (0.6 to 4.8)*      |           |                       |
|        |                         | Regional           | -1.0 (-1.5 to -0.4)** | 1      | 1993–2015 | -1.0 (-1.5 to -0.4)** |           |                        |           |                       |
|        |                         | Distant            | 0.3 (-1.8 to 2.4)     | 3      | 1993–2005 | -1.2 (-2.8 to 0.4)    | 2005–2010 | 10.3 (2.2 to 18.9)*    | 2010–2015 | -5.5 (-10.3 to -0.5)* |
|        | Adenocarcinoma          | Localized          | 5.1 (4.6 to 5.7)***   | 1      | 1993–2015 | 5.1 (4.6 to 5.7)***   |           |                        |           |                       |
|        |                         | Regional           | -0.9 (-2.0 to 0.2)    | 2      | 1993–2009 | 1.3 (0.4 to 2.2)**    | 2009–2015 | -6.7 (-10.1 to -3.1)** |           |                       |
|        |                         | Distant            | 2.8 (2.2 to 3.4)***   | 1      | 1993–2015 | 2.8 (2.2 to 3.4)***   |           |                        |           |                       |
| Female | Small cell carcinoma    | Localized          | -2.4 (-5.1 to 0.5)    | 1      | 1993–2015 | -2.4 (-5.1 to 0.5)    |           |                        |           |                       |
|        |                         | Regional           | -0.5 (-2.7 to 1.8)    | 1      | 1993–2015 | -0.5 (-2.7 to 1.8)    |           |                        |           |                       |
|        |                         | Distant            | 3.6 (0.6 to 6.6)*     | 2      | 1993–1999 | -5.4 (-14.6 to 4.8)   | 1999–2015 | 7.1 (5.1 to 9.3)***    |           |                       |
|        | Squamous cell carcinoma | Localized          | 2.1 (0.3 to 3.9)*     | 1      | 1993–2015 | 2.1 (0.3 to 3.9)*     |           |                        |           |                       |
|        |                         | Regional           | 1.8 (0.1 to 3.6)*     | 1      | 1993–2015 | 1.8 (0.1 to 3.6)*     |           |                        |           |                       |
|        |                         | Distant            | 1.6 (-0.4 to 3.6)     | 1      | 1993–2015 | 1.6 (-0.4 to 3.6)     |           |                        |           |                       |
|        | Adenocarcinoma          | Localized          | 6.3 (5.6 to 7.1)***   | 1      | 1993–2015 | 6.3 (5.6 to 7.1)***   |           |                        |           |                       |
|        |                         | Regional           | -1.6 (-4.2 to 1.1)    | 2      | 1993–2011 | 1.3 (-0.0 to 2.6)     | 2011–2015 | -13.5 (-25.4 to 0.2)   |           |                       |
|        |                         | Distant            | 3.0 (1.2 to 4.9)**    | 2      | 1993–2003 | 0.1 (-3.2 to 3.5)     | 2003–2015 | 5.5 (3.3 to 7.8)***    |           |                       |

Notes: ASIRs=Age-standardized incidence rates; AAPC=Average annual percentage change; APC=Annual percentage change; CI=Confidence Interval; \*\*\*, \*\*, \* Statistically significant results with P<0.001, P<0.01, and P<0.05, respectively; Three Japanese cancer registries are in Yamagata, Fukui and Nagasaki prefectures.

Table S9: Kaplan-Meier log-rank test for equality in survival probability between the completed and imputed data in three cancer registries in Japan, 1993–2015, by stage at diagnosis

| Year at diagnosis | Stage at diagnosis (P-values from Kaplan-Meier log-rank test) |          |         |
|-------------------|---------------------------------------------------------------|----------|---------|
|                   | Localized                                                     | Regional | Distant |
| 1993              | 1.000                                                         | 0.940    | 0.772   |
| 1994              | 1.000                                                         | 0.965    | 0.526   |
| 1995              | 1.000                                                         | 0.890    | 0.547   |
| 1996              | 1.000                                                         | 0.576    | 0.808   |
| 1997              | 1.000                                                         | 0.821    | 0.683   |
| 1998              | 0.995                                                         | 0.605    | 0.897   |
| 1999              | 0.997                                                         | 0.802    | 0.855   |
| 2000              | 0.990                                                         | 0.643    | 0.496   |
| 2001              | 0.910                                                         | 0.841    | 0.615   |
| 2002              | 0.962                                                         | 0.667    | 0.724   |
| 2003              | 0.974                                                         | 0.824    | 0.762   |
| 2004              | 0.867                                                         | 0.681    | 0.616   |
| 2005              | 0.753                                                         | 0.970    | 0.908   |
| 2006              | 0.912                                                         | 0.927    | 0.907   |
| 2007              | 0.993                                                         | 0.953    | 0.810   |
| 2008              | 0.944                                                         | 0.870    | 0.665   |
| 2009              | 0.970                                                         | 0.971    | 0.847   |
| 2010              | 0.985                                                         | 0.993    | 0.690   |
| 2011              | 0.988                                                         | 0.973    | 0.945   |
| 2012              | 0.987                                                         | 0.962    | 0.971   |
| 2013              | 0.987                                                         | 0.978    | 0.975   |
| 2014              | 0.858                                                         | 0.916    | 0.658   |
| 2015              | 0.519                                                         | 0.842    | 0.245   |

Notes: Three Japanese cancer registries are in Yamagata, Fukui and Nagasaki prefectures.

Table S10: Kaplan-Meier log-rank test for equality in survival probability between the completed and imputed data in three cancer registries in Japan, 1993–2015, by histological type

| Year at diagnosis | Histological type (P-values from Kaplan-Meier log-rank test) |                         |                |                      |                                |                                       |
|-------------------|--------------------------------------------------------------|-------------------------|----------------|----------------------|--------------------------------|---------------------------------------|
|                   | Small Cell Carcinoma                                         | Squamous cell carcinoma | Adenocarcinoma | Large cell carcinoma | Other non-small cell carcinoma | Other specified and unspecified types |
| 1993              | 1.000                                                        | 1.000                   | 0.993          | 1.000                | 1.000                          | 1.000                                 |
| 1994              | 1.000                                                        | 1.000                   | 1.000          | 1.000                | 1.000                          | 1.000                                 |
| 1995              | 1.000                                                        | 1.000                   | 0.999          | 1.000                | 1.000                          | 1.000                                 |
| 1996              | 1.000                                                        | 1.000                   | 0.998          | 1.000                | 1.000                          | 1.000                                 |
| 1997              | 1.000                                                        | 1.000                   | 0.992          | 1.000                | 1.000                          | 1.000                                 |
| 1998              | 1.000                                                        | 1.000                   | 1.000          | 1.000                | 1.000                          | 1.000                                 |
| 1999              | 1.000                                                        | 1.000                   | 0.994          | 1.000                | 1.000                          | 1.000                                 |
| 2000              | 1.000                                                        | 0.999                   | 0.973          | 1.000                | 1.000                          | 1.000                                 |
| 2001              | 0.999                                                        | 1.000                   | 0.907          | 1.000                | 1.000                          | 1.000                                 |
| 2002              | 0.999                                                        | 1.000                   | 0.973          | 1.000                | 1.000                          | 1.000                                 |
| 2003              | 1.000                                                        | 0.999                   | 0.847          | 1.000                | 1.000                          | 1.000                                 |
| 2004              | 1.000                                                        | 0.998                   | 0.793          | 1.000                | 1.000                          | 1.000                                 |
| 2005              | 1.000                                                        | 0.999                   | 0.829          | 1.000                | 1.000                          | 1.000                                 |
| 2006              | 1.000                                                        | 1.000                   | 0.863          | 1.000                | 1.000                          | 1.000                                 |
| 2007              | 1.000                                                        | 0.996                   | 0.711          | 1.000                | 1.000                          | 1.000                                 |
| 2008              | 1.000                                                        | 1.000                   | 0.719          | 1.000                | 1.000                          | 1.000                                 |
| 2009              | 0.999                                                        | 1.000                   | 0.538          | 1.000                | 1.000                          | 1.000                                 |
| 2010              | 1.000                                                        | 0.992                   | 0.397          | 1.000                | 1.000                          | 1.000                                 |
| 2011              | 1.000                                                        | 0.998                   | 0.604          | 1.000                | 1.000                          | 1.000                                 |
| 2012              | 1.000                                                        | 0.999                   | 0.323          | 1.000                | 1.000                          | 1.000                                 |
| 2013              | 1.000                                                        | 0.985                   | 0.097          | 1.000                | 1.000                          | 1.000                                 |
| 2014              | 0.999                                                        | 0.867                   | 0.093          | 1.000                | 1.000                          | 1.000                                 |
| 2015              | 0.988                                                        | 0.793                   | 0.152          | 1.000                | 1.000                          | 1.000                                 |

Notes: Three Japanese cancer registries are in Yamagata, Fukui and Nagasaki prefectures.

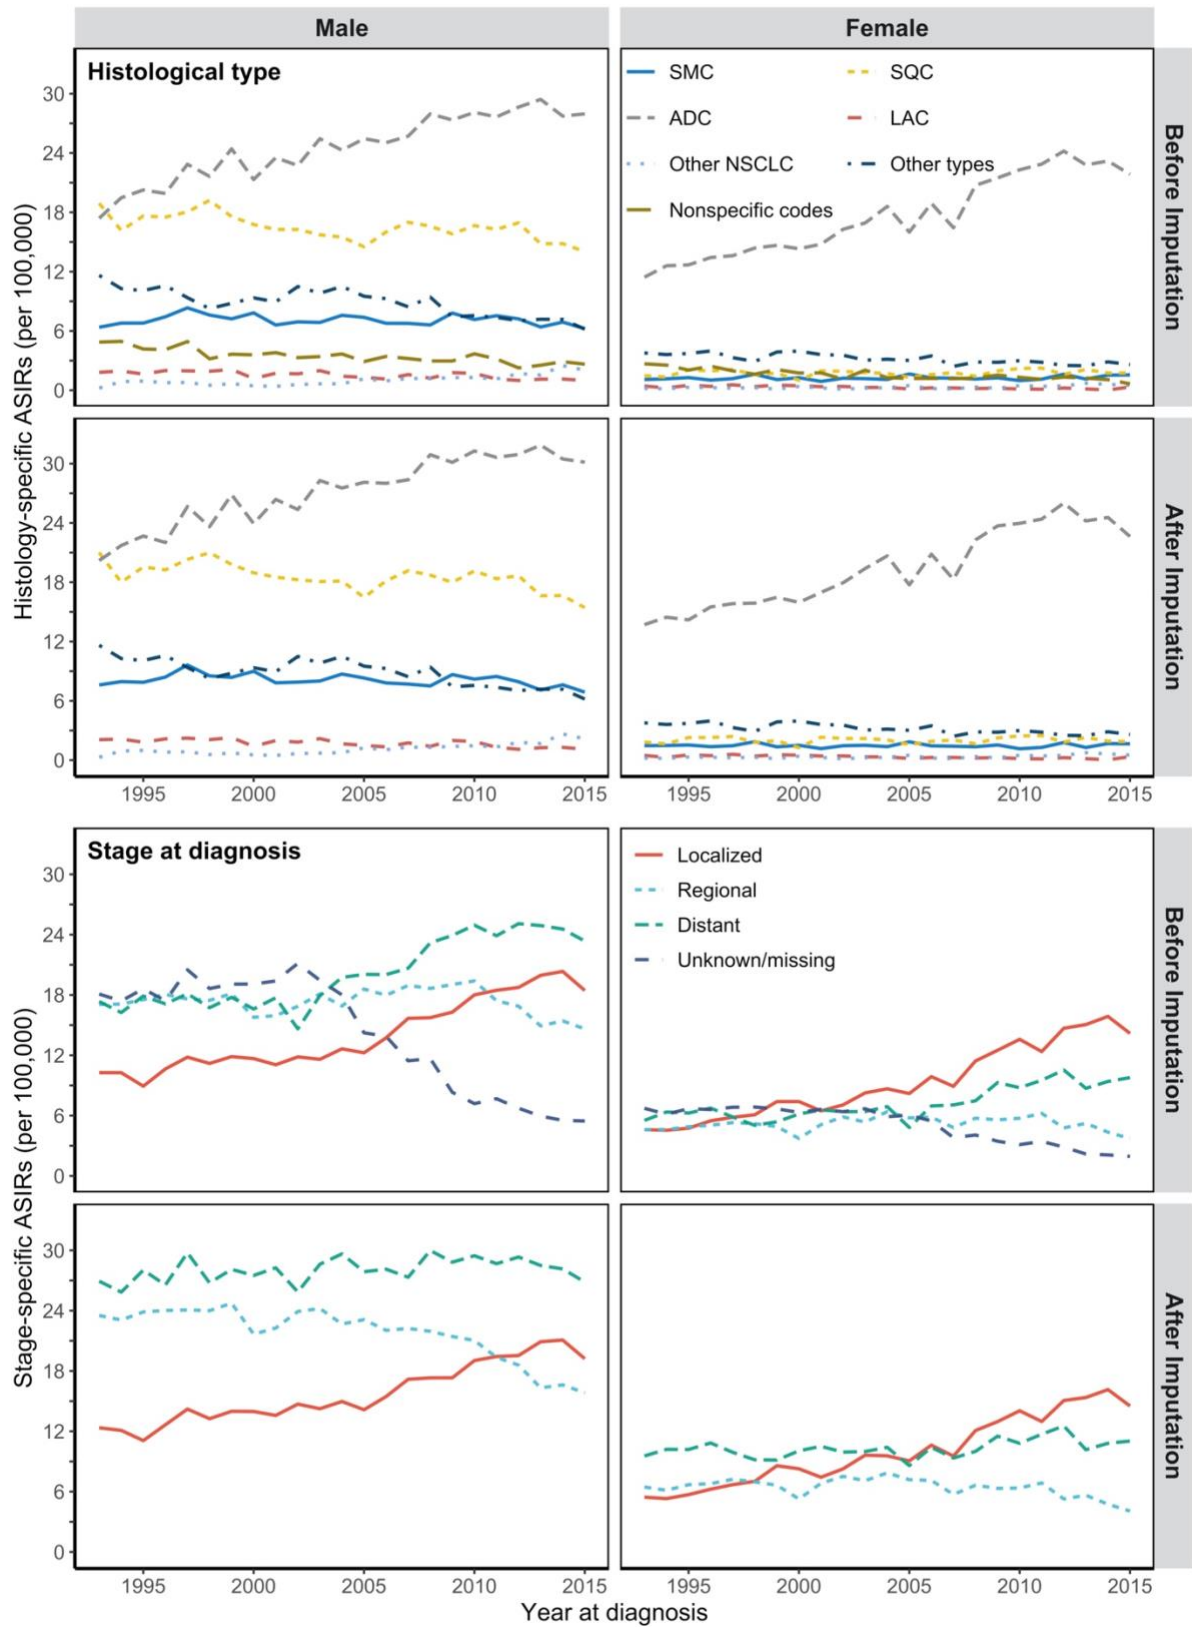

Figure S1: Completed and imputed ASIRs (before and after imputation) of lung cancer in three cancer registries in Japan, 1993–2015, by histological type and stage at diagnosis

Notes: ASIRs=Age-standardized incidence rates; SMC=Small cell carcinoma; SQC=Squamous cell carcinoma; ADC=Adenocarcinoma; The solid lines are the completed trends; The dashed lines are the imputed trends; The shaded areas are the 95% Confidence Intervals; Three Japanese cancer registries are in Yamagata, Fukui and Nagasaki prefectures.

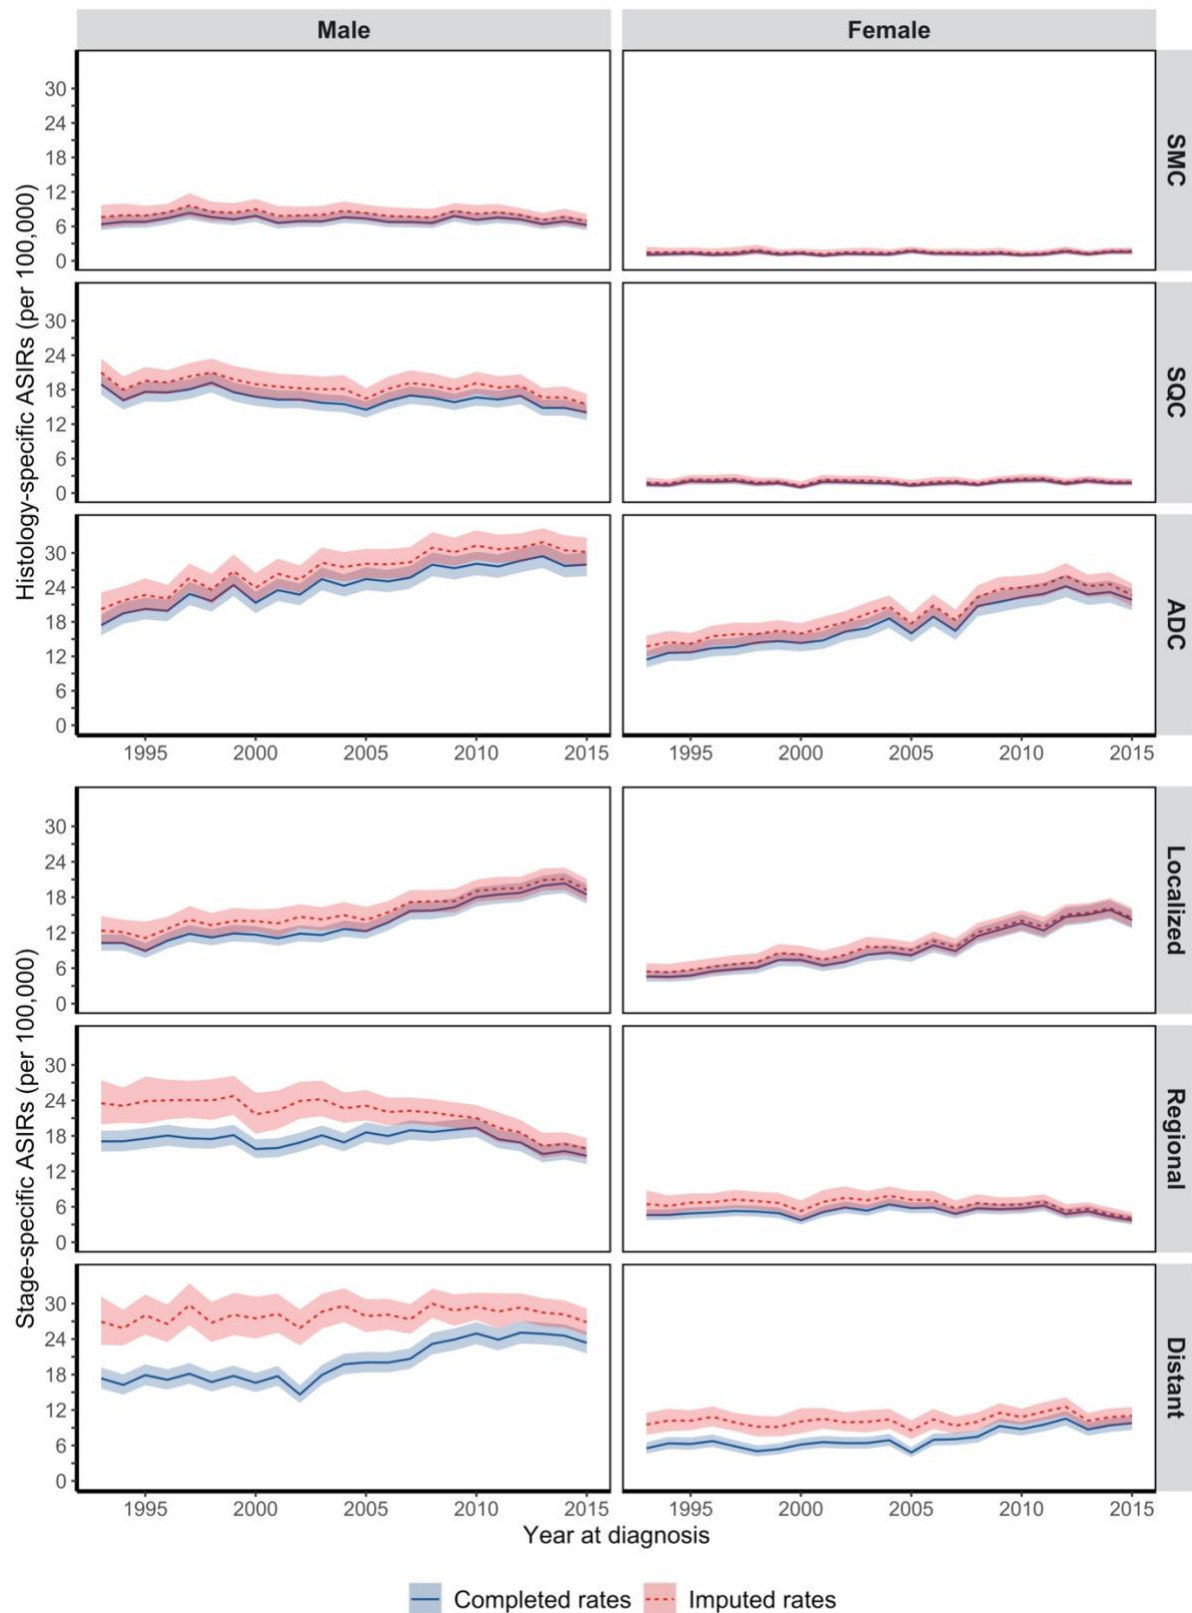

Figure S2: Histology- and stage-specific ASIRs of lung cancer in three cancer registries in Japan, 1993–2015, separately by completed and imputed data (before and after imputation)  
 Notes: ASIRs=Age-standardized incidence rates; SMC=Small cell carcinoma; SQC=Squamous cell carcinoma; ADC=Adenocarcinoma, LAC=Large cell carcinoma; Other NSCLC=Other non-small cell lung cancer; Other types=Other specified and unspecified types. The three Japanese cancer registries are in Yamagata, Fukui and Nagasaki prefectures.

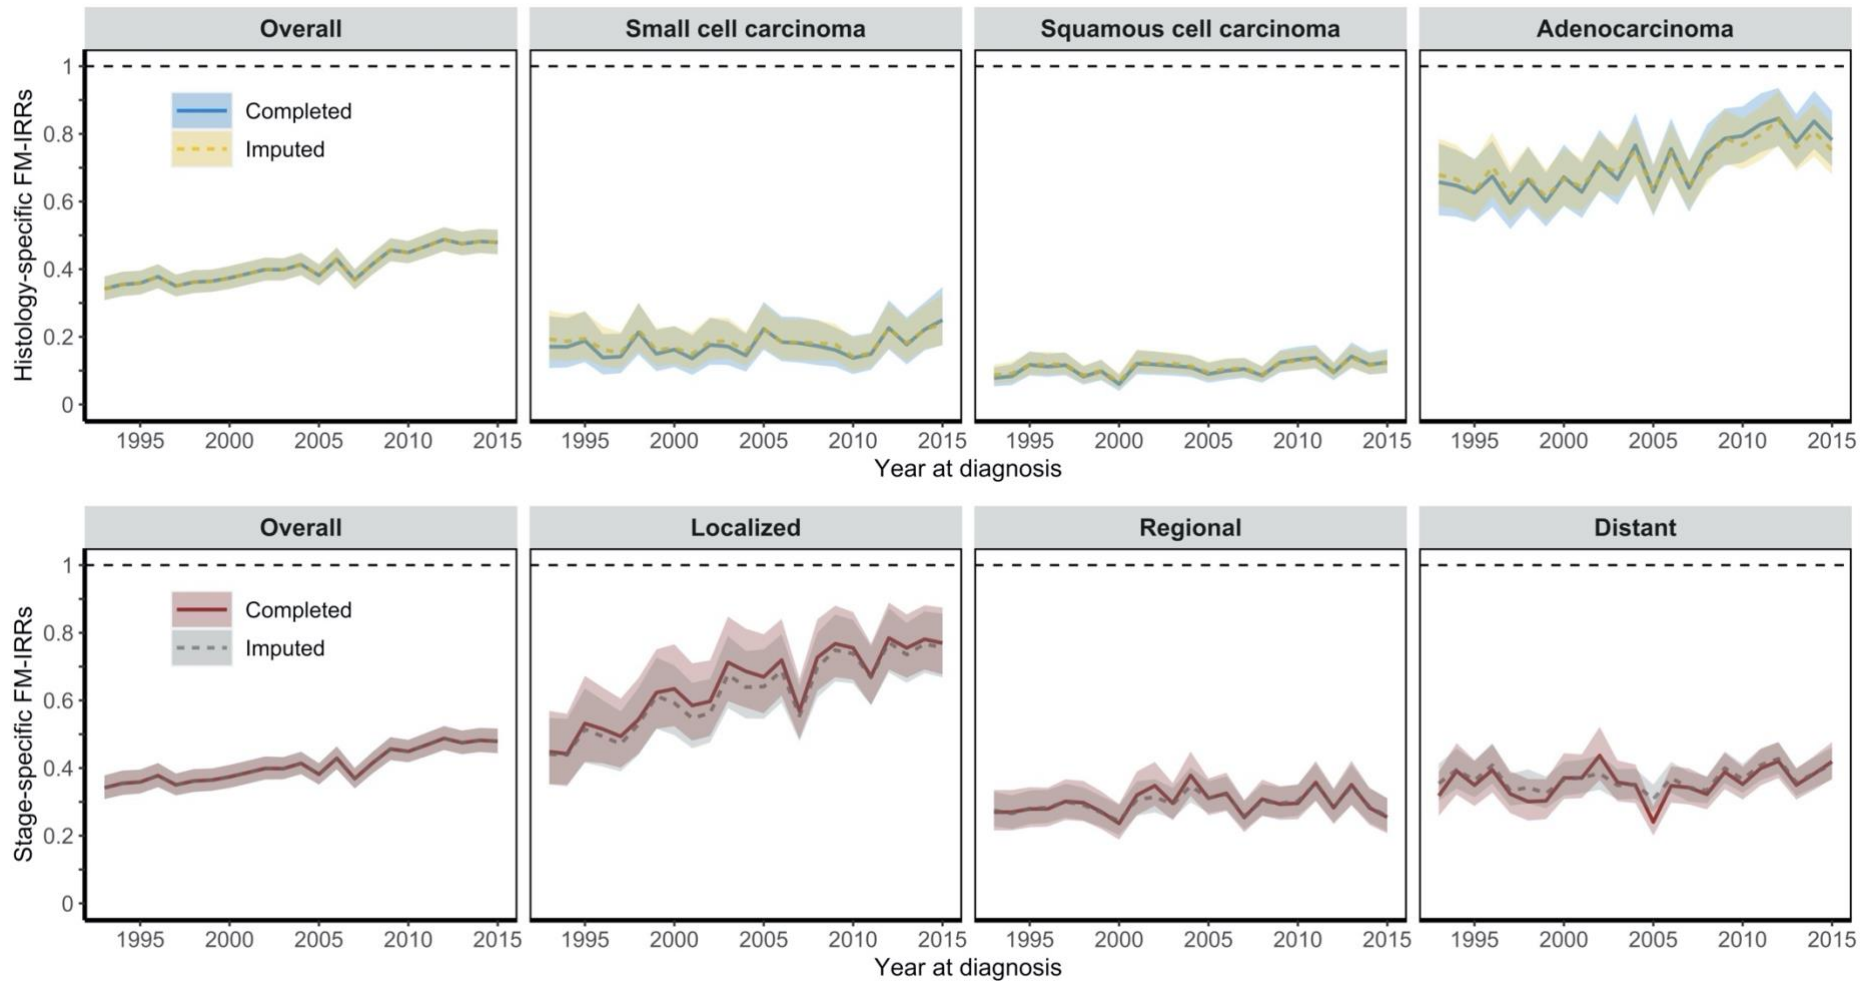

Figure S3: Completed and imputed female-to-male IRRs (before and after imputation) of lung cancer in three cancer registries in Japan, 1993–2015, by histological type and stage at diagnosis separately

Notes: IRRs=Incidence rate ratios; The solid lines are the completed trends; The dashed lines are the imputed trends; The shaded areas are the 95% Confidence Intervals; Three Japanese cancer registries are in Yamagata, Fukui and Nagasaki prefectures.
